# Supplementary material
Source: PubMed Central journal article supplement (PMC7416565)
Supplement: media-1.pdf [file media-1.pdf]

## Supplementary Information

### Low baseline pulmonary levels of cytotoxic lymphocytes as a predisposing risk factor for severe COVID-19

Pascal H.G. Duijf

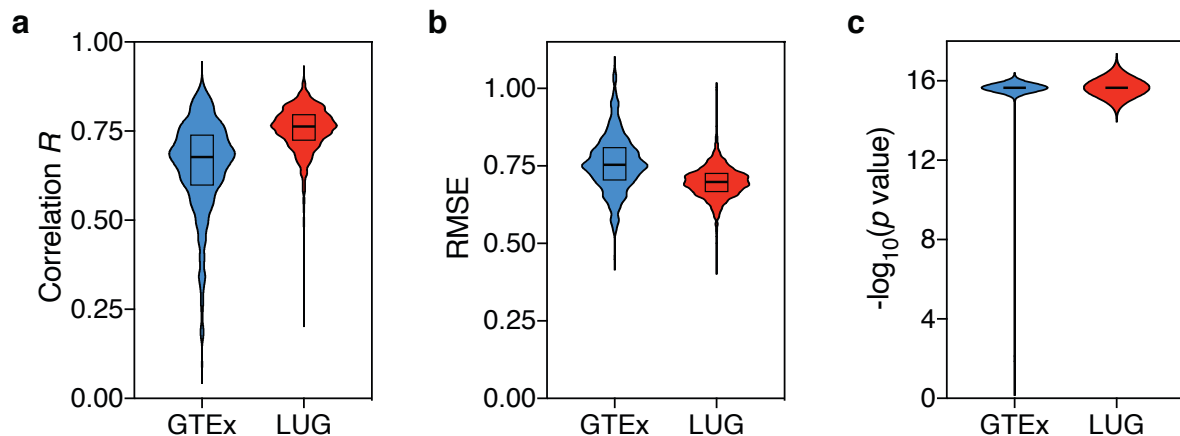

**Figure S1. *In silico* cytometry statistics.**

Per-sample statistics of *in silico* cytometry on human lung tissues are shown for the GTEx (n=578) and LUG (n=1,349) datasets. (a) Pearson correlation coefficients  $R$ . (b) Root mean square errors (RMSE). (c)  $p$  values.  $P$  values  $< 2.2 \times 10^{-16}$  were processed as equal to  $2.2 \times 10^{-16}$ . Source data are provided in Table S1.

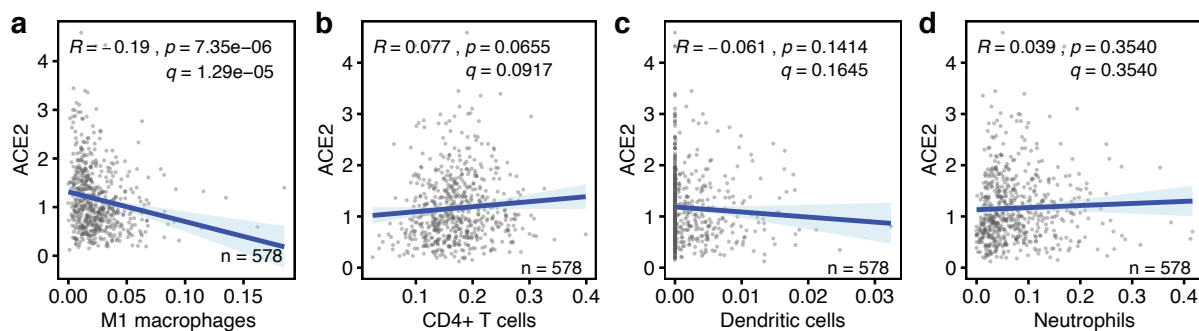

**Figure S2. Correlations between baseline anti-viral leukocyte levels and ACE2 expression levels in human lung tissues.**

(a-d) The correlations between the baseline levels of indicated immune cell types (x-axes) and the expression level of the SARS-CoV-2 host cell receptor ACE2 (y-axis) in human lung tissue are shown. Data are from the GTEx dataset (n=578). Regression lines and 95% confidence intervals are shown.  $R$  and  $p$  values: Pearson correlations;  $q$  values: Benjamini-Hochberg-adjusted  $p$  values using a false discovery rate of 0.05. See also Figure 1.

**Figure S3. Correlation between baseline M1 macrophage levels and ACE2 expression level in human lung tissue.**

The correlation between these variables is shown as described in Figure S2. Data are from the LUG dataset (n=1,349).

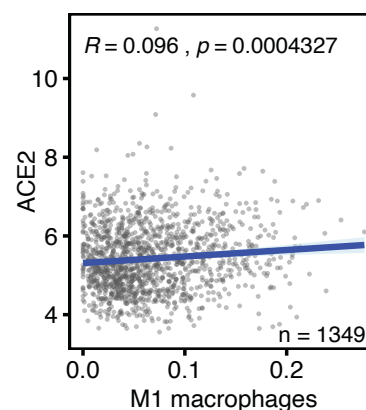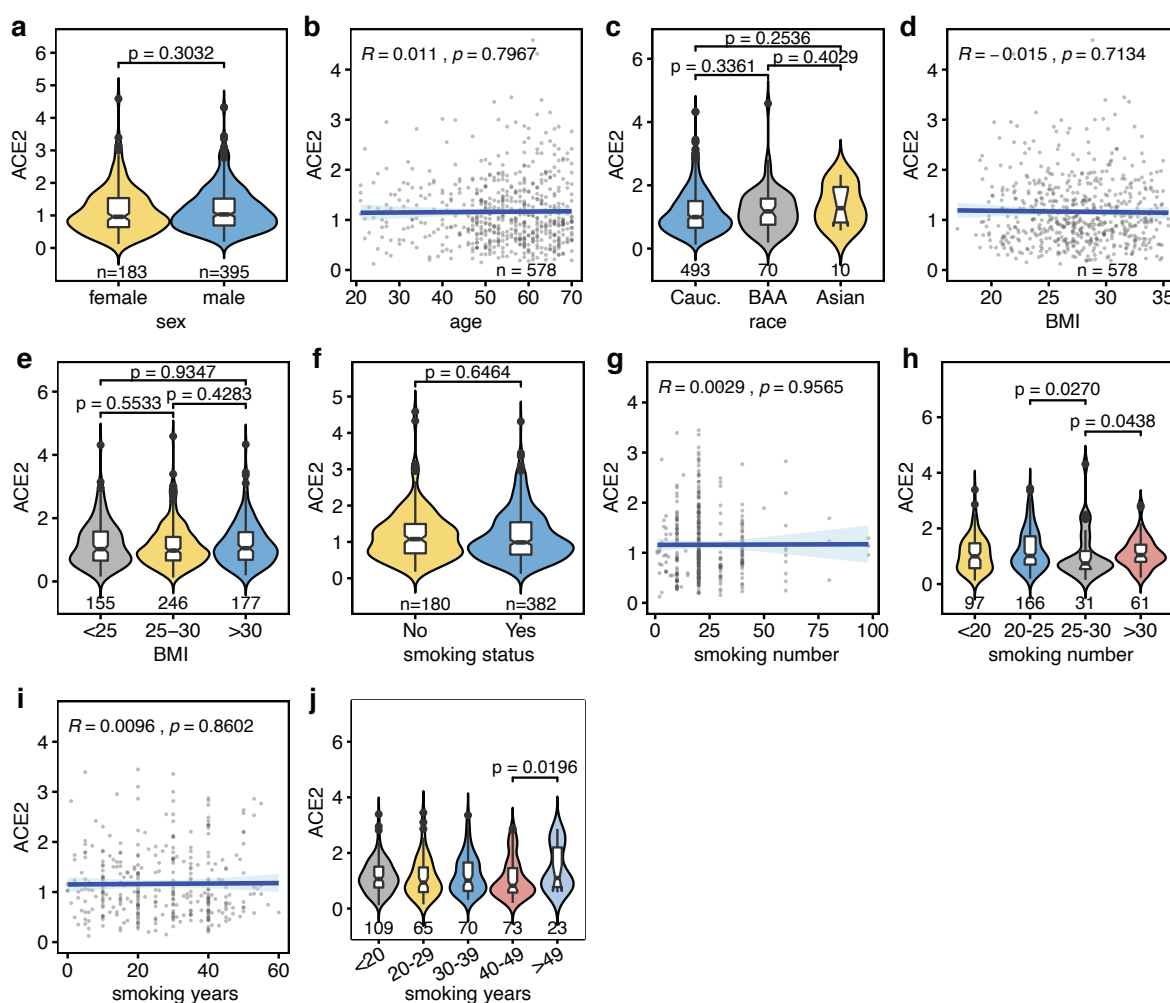

**Figure S4. Univariate analyses of phenotypic covariates included in multivariate analyses.**

Univariate analyses of five covariates that were included in multivariate analyses of ACE2 and TMPRSS2 expression in human lung tissue using the GTEx dataset (Tables S2, S3). **(a)** Sex. **(b)** Age, **(c)** Race. **(d, e)** Body mass index. **(f-j)** Smoking behavior, referring to smoking status (smoker/non-smoker) (f), number of units smoked during the smoke period (g, h) and number of years smoked (i, j). *P* values in categorical analyses: Mann-Whitney *U* tests. *R* and *p* values in continuous analyses: Pearson correlations. *P* values in panels h and j are only shown if  $p < 0.05$ . Sample numbers (n) are shown on the x-axes.

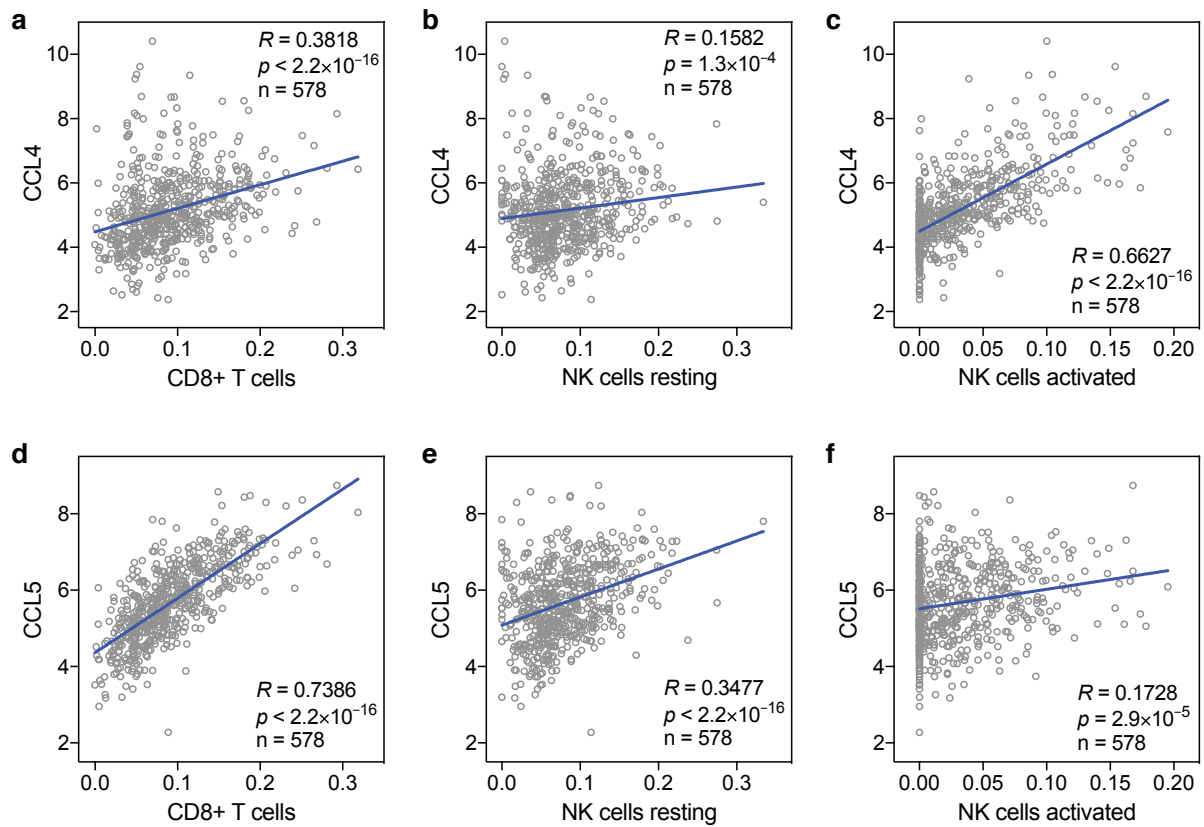

**Figure S5. Correlations between baseline levels of cytotoxic lymphocytes and CCL4 and CCL5 in human lung tissue.**

The correlations between baseline levels of the chemokines CCL4, CCL5 and CD8+ T cells, resting and activated NK cells in human lung tissue are shown. Data are from the GTEx dataset (n=578). *R* and *p* values: Spearman correlations. See also Figure 2g.

**Table S1. Source data of *in silico* cytometry statistics**

For each sample in the GTEX (n=578) and LUG (n=1,349) datasets, Pearson correlation coefficient *R*, root mean square error (RMSE) and  $-\log_{10}(p)$  value are shown. These are the source data of Figure S1.

| Sam<br>ple n | GTEX       |            | GTEX -<br>log <sub>10</sub> pval |          | LUG      |          | LUG -<br>log <sub>10</sub> pval |      |
|--------------|------------|------------|----------------------------------|----------|----------|----------|---------------------------------|------|
|              | GTEX R     | RMSE       | GTEX R                           | pval     | LUG R    | RMSE     | LUG R                           | pval |
| 1            | 0.76787006 | 0.64982766 | 15.6575773                       | 0.802959 | 0.649639 | 15.65758 |                                 |      |
| 2            | 0.33960379 | 0.95534778 | 15.6575773                       | 0.766379 | 0.707377 | 15.65758 |                                 |      |
| 3            | 0.69311497 | 0.73304977 | 15.6575773                       | 0.787641 | 0.676389 | 15.65758 |                                 |      |
| 4            | 0.7996746  | 0.60995383 | 15.6575773                       | 0.681417 | 0.76724  | 15.65758 |                                 |      |
| 5            | 0.81489669 | 0.5873594  | 15.6575773                       | 0.742665 | 0.717019 | 15.65758 |                                 |      |
| 6            | 0.7328384  | 0.69463011 | 15.6575773                       | 0.801268 | 0.654958 | 15.65758 |                                 |      |
| 7            | 0.55167376 | 0.83420724 | 15.6575773                       | 0.728905 | 0.715461 | 15.65758 |                                 |      |
| 8            | 0.6898905  | 0.73547426 | 15.6575773                       | 0.779413 | 0.697019 | 15.65758 |                                 |      |
| 9            | 0.74337414 | 0.7268448  | 15.6575773                       | 0.773965 | 0.690504 | 15.65758 |                                 |      |
| 10           | 0.48677652 | 0.87413605 | 15.6575773                       | 0.777735 | 0.69054  | 15.65758 |                                 |      |
| 11           | 0.55088695 | 0.83618046 | 15.6575773                       | 0.789392 | 0.682538 | 15.65758 |                                 |      |
| 12           | 0.72198448 | 0.72751001 | 15.6575773                       | 0.747533 | 0.711919 | 15.65758 |                                 |      |
| 13           | 0.44847706 | 0.89376979 | 15.6575773                       | 0.842775 | 0.586167 | 15.65758 |                                 |      |
| 14           | 0.70299836 | 0.72682982 | 15.6575773                       | 0.761953 | 0.700298 | 15.65758 |                                 |      |
| 15           | 0.743309   | 0.70328228 | 15.6575773                       | 0.753612 | 0.708944 | 15.65758 |                                 |      |
| 16           | 0.62707528 | 0.79388999 | 15.6575773                       | 0.804003 | 0.657556 | 15.65758 |                                 |      |
| 17           | 0.65149292 | 0.77493294 | 15.6575773                       | 0.810269 | 0.653416 | 15.65758 |                                 |      |
| 18           | 0.71063774 | 0.74524749 | 15.6575773                       | 0.771608 | 0.701303 | 15.65758 |                                 |      |
| 19           | 0.61600528 | 0.8063179  | 15.6575773                       | 0.797468 | 0.669538 | 15.65758 |                                 |      |
| 20           | 0.53761731 | 0.84298471 | 15.6575773                       | 0.757637 | 0.707872 | 15.65758 |                                 |      |
| 21           | 0.61042154 | 0.79213496 | 15.6575773                       | 0.706046 | 0.744027 | 15.65758 |                                 |      |
| 22           | 0.76173265 | 0.68612869 | 15.6575773                       | 0.757324 | 0.704732 | 15.65758 |                                 |      |
| 23           | 0.5923411  | 0.81590966 | 15.6575773                       | 0.788137 | 0.684214 | 15.65758 |                                 |      |
| 24           | 0.57111551 | 0.82945874 | 15.6575773                       | 0.758922 | 0.67449  | 15.65758 |                                 |      |
| 25           | 0.70245483 | 0.74771223 | 15.6575773                       | 0.800876 | 0.675024 | 15.65758 |                                 |      |
| 26           | 0.71931585 | 0.70114944 | 15.6575773                       | 0.748056 | 0.717971 | 15.65758 |                                 |      |
| 27           | 0.67884846 | 0.74083394 | 15.6575773                       | 0.739715 | 0.723634 | 15.65758 |                                 |      |
| 28           | 0.7007555  | 0.72235034 | 15.6575773                       | 0.780562 | 0.674622 | 15.65758 |                                 |      |
| 29           | 0.72923843 | 0.71907274 | 15.6575773                       | 0.782376 | 0.682771 | 15.65758 |                                 |      |
| 30           | 0.55756861 | 0.82973695 | 15.6575773                       | 0.726186 | 0.73166  | 15.65758 |                                 |      |
| 31           | 0.62325326 | 0.79139104 | 15.6575773                       | 0.813847 | 0.649338 | 15.65758 |                                 |      |
| 32           | 0.63886768 | 0.77930902 | 15.6575773                       | 0.805055 | 0.660688 | 15.65758 |                                 |      |
| 33           | 0.44888773 | 0.89528101 | 15.6575773                       | 0.736178 | 0.715388 | 15.65758 |                                 |      |
| 34           | 0.68212751 | 0.74938995 | 15.6575773                       | 0.811061 | 0.663174 | 15.65758 |                                 |      |
| 35           | 0.73205242 | 0.68283704 | 15.6575773                       | 0.68782  | 0.758606 | 15.65758 |                                 |      |
| 36           | 0.68262106 | 0.75168703 | 15.6575773                       | 0.819304 | 0.652341 | 15.65758 |                                 |      |
| 37           | 0.48008816 | 0.88349271 | 15.6575773                       | 0.762902 | 0.701996 | 15.65758 |                                 |      |
| 38           | 0.45440411 | 0.89026941 | 15.6575773                       | 0.685527 | 0.761058 | 15.65758 |                                 |      |
| 39           | 0.60434542 | 0.79776549 | 15.6575773                       | 0.768102 | 0.690433 | 15.65758 |                                 |      |
| 40           | 0.82054193 | 0.57404279 | 15.6575773                       | 0.835847 | 0.617019 | 15.65758 |                                 |      |
| 41           | 0.69813151 | 0.75070076 | 15.6575773                       | 0.835447 | 0.633442 | 15.65758 |                                 |      |
| 42           | 0.62125354 | 0.78878221 | 15.6575773                       | 0.774305 | 0.690438 | 15.65758 |                                 |      |
| 43           | 0.75157392 | 0.68798327 | 15.6575773                       | 0.821192 | 0.634717 | 15.65758 |                                 |      |
| 44           | 0.38777408 | 0.92960941 | 15.6575773                       | 0.736161 | 0.721822 | 15.65758 |                                 |      |
| 45           | 0.82524164 | 0.63701517 | 15.6575773                       | 0.774914 | 0.694771 | 15.65758 |                                 |      |
| 46           | 0.51701022 | 0.86026052 | 15.6575773                       | 0.817019 | 0.65777  | 15.65758 |                                 |      |
| 47           | 0.56007914 | 0.83677468 | 15.6575773                       | 0.8374   | 0.597228 | 15.65758 |                                 |      |
| 48           | 0.71308175 | 0.70717759 | 15.6575773                       | 0.763472 | 0.70808  | 15.65758 |                                 |      |
| 49           | 0.62706859 | 0.79677808 | 15.6575773                       | 0.723793 | 0.732254 | 15.65758 |                                 |      |
| 50           | 0.71172223 | 0.74130879 | 15.6575773                       | 0.840075 | 0.586469 | 15.65758 |                                 |      |
| 51           | 0.77950068 | 0.64522993 | 15.6575773                       | 0.780776 | 0.690774 | 15.65758 |                                 |      |
| 52           | 0.68360264 | 0.74101263 | 15.6575773                       | 0.781202 | 0.687471 | 15.65758 |                                 |      |
| 53           | 0.84172362 | 0.62704355 | 15.6575773                       | 0.784475 | 0.654003 | 15.65758 |                                 |      |
| 54           | 0.31660463 | 0.95729498 | 15.6575773                       | 0.796829 | 0.669062 | 15.65758 |                                 |      |
| 55           | 0.68785982 | 0.75314287 | 15.6575773                       | 0.700059 | 0.745584 | 15.65758 |                                 |      |
| 56           | 0.70464449 | 0.74925695 | 15.6575773                       | 0.795957 | 0.679328 | 15.65758 |                                 |      |
| 57           | 0.70970752 | 0.74479217 | 15.6575773                       | 0.823785 | 0.631725 | 15.65758 |                                 |      |
| 58           | 0.62238904 | 0.79602679 | 15.6575773                       | 0.793232 | 0.683047 | 15.65758 |                                 |      |
| 59           | 0.52698581 | 0.84930394 | 15.6575773                       | 0.819992 | 0.644026 | 15.65758 |                                 |      |
| 60           | 0.73123587 | 0.70101211 | 15.6575773                       | 0.749767 | 0.699034 | 15.65758 |                                 |      |
| 61           | 0.7674915  | 0.70041919 | 15.6575773                       | 0.727959 | 0.726717 | 15.65758 |                                 |      |
| 62           | 0.62789934 | 0.78044364 | 15.6575773                       | 0.770688 | 0.703886 | 15.65758 |                                 |      |
| 63           | 0.60410025 | 0.80136883 | 15.6575773                       | 0.737926 | 0.714894 | 15.65758 |                                 |      |
| 64           | 0.57227658 | 0.82550032 | 15.6575773                       | 0.749034 | 0.706154 | 15.65758 |                                 |      |
| 65           | 0.76991092 | 0.65403992 | 15.6575773                       | 0.746872 | 0.711799 | 15.65758 |                                 |      |
| 66           | 0.68588497 | 0.73930282 | 15.6575773                       | 0.742272 | 0.717509 | 15.65758 |                                 |      |
| 67           | 0.60545218 | 0.80540731 | 15.6575773                       | 0.693004 | 0.74553  | 15.65758 |                                 |      |
| 68           | 0.72715468 | 0.70593705 | 15.6575773                       | 0.725727 | 0.725521 | 15.65758 |                                 |      |
| 69           | 0.82942443 | 0.63454869 | 15.6575773                       | 0.805247 | 0.660876 | 15.65758 |                                 |      |
| 70           | 0.71425946 | 0.7176295  | 15.6575773                       | 0.825733 | 0.620069 | 15.65758 |                                 |      |
| 71           | 0.77765493 | 0.66701741 | 15.6575773                       | 0.766407 | 0.69845  | 15.65758 |                                 |      |
| 72           | 0.70485216 | 0.71288925 | 15.6575773                       | 0.738098 | 0.727688 | 15.65758 |                                 |      |
| 73           | 0.70049108 | 0.72082562 | 15.6575773                       | 0.761357 | 0.701782 | 15.65758 |                                 |      |
| 74           | 0.49294211 | 0.87118578 | 15.6575773                       | 0.772676 | 0.688762 | 15.65758 |                                 |      |
| 75           | 0.74102721 | 0.69347067 | 15.6575773                       | 0.738963 | 0.717142 | 15.65758 |                                 |      |
| 76           | 0.68292334 | 0.74742974 | 15.6575773                       | 0.820638 | 0.654015 | 15.65758 |                                 |      |
| 77           | 0.68202831 | 0.74271381 | 15.6575773                       | 0.804679 | 0.677565 | 15.65758 |                                 |      |
| 78           | 0.66058818 | 0.77004578 | 15.6575773                       | 0.814325 | 0.667653 | 15.65758 |                                 |      |
| 79           | 0.61258367 | 0.7911726  | 15.6575773                       | 0.715896 | 0.727023 | 15.65758 |                                 |      |
| 80           | 0.66021942 | 0.76245576 | 15.6575773                       | 0.757175 | 0.711845 | 15.65758 |                                 |      |
| 81           | 0.73545094 | 0.70171276 | 15.6575773                       | 0.745553 | 0.71137  | 15.65758 |                                 |      |
| 82           | 0.76539688 | 0.70190687 | 15.6575773                       | 0.812    | 0.653151 | 15.65758 |                                 |      |
| 83           | 0.52249671 | 0.85192189 | 15.6575773                       | 0.747185 | 0.716424 | 15.65758 |                                 |      |
| 84           | 0.50301948 | 0.86526106 | 15.6575773                       | 0.803403 | 0.669913 | 15.65758 |                                 |      |
| 85           | 0.51410756 | 0.85722208 | 15.6575773                       | 0.789727 | 0.672406 | 15.65758 |                                 |      |
| 86           | 0.54248051 | 0.84295889 | 15.6575773                       | 0.672214 | 0.76654  | 15.65758 |                                 |      |
| 87           | 0.54325456 | 0.83888963 | 15.6575773                       | 0.705861 | 0.743058 | 15.65758 |                                 |      |
| 88           | 0.67174415 | 0.7604468  | 15.6575773                       | 0.704747 | 0.743665 | 15.65758 |                                 |      |
| 89           | 0.19835402 | 1.04850401 | 2                                | 0.804903 | 0.650558 | 15.65758 |                                 |      |
| 90           | 0.80546361 | 0.6228925  | 15.6575773                       | 0.774205 | 0.670835 | 15.65758 |                                 |      |
| 91           | 0.77078186 | 0.66191298 | 15.6575773                       | 0.733251 | 0.716882 | 15.65758 |                                 |      |
| 92           | 0.61667107 | 0.80159867 | 15.6575773                       | 0.756188 | 0.711612 | 15.65758 |                                 |      |
| 93           | 0.6965581  | 0.72055837 | 15.6575773                       | 0.799211 | 0.669125 | 15.65758 |                                 |      |
| 94           | 0.72414493 | 0.69095633 | 15.6575773                       | 0.775547 | 0.686414 | 15.65758 |                                 |      |
| 95           | 0.56751768 | 0.82297723 | 15.6575773                       | 0.771394 | 0.687734 | 15.65758 |                                 |      |
| 96           | 0.68384218 | 0.7419826  | 15.6575773                       | 0.722536 | 0.694775 | 15.65758 |                                 |      |
| 97           | 0.55867087 | 0.83016121 | 15.6575773                       | 0.739445 | 0.719632 | 15.65758 |                                 |      |
| 98           | 0.59189641 | 0.80927822 | 15.6575773                       | 0.731612 | 0.725989 | 15.65758 |                                 |      |
| 99           | 0.66689221 | 0.74551067 | 15.6575773                       | 0.762586 | 0.705917 | 15.65758 |                                 |      |
| 100          | 0.76408857 | 0.68936908 | 15.6575773                       | 0.755818 | 0.682473 | 15.65758 |                                 |      |
| 101          | 0.78195749 | 0.65704796 | 15.6575773                       | 0.781971 | 0.6349   | 15.65758 |                                 |      |
| 102          | 0.62157124 | 0.79616277 | 15.6575773                       | 0.782796 | 0.679205 | 15.65758 |                                 |      |
| 103          | 0.69262931 | 0.73158418 | 15.6575773                       | 0.711814 | 0.741561 | 15.65758 |                                 |      |
| 104          | 0.35999342 | 0.93722591 | 15.6575773                       | 0.830347 | 0.667358 | 15.65758 |                                 |      |
| 105          | 0.57105776 | 0.82676047 | 15.6575773                       | 0.742403 | 0.721198 | 15.65758 |                                 |      |
| 106          | 0.61157077 | 0.79751651 | 15.6575773                       | 0.8256   | 0.632411 | 15.65758 |                                 |      |
| 107          | 0.62836027 | 0.78725474 | 15.6575773                       | 0.723734 | 0.72605  | 15.65758 |                                 |      |
| 108          | 0.63730953 | 0.77172128 | 15.6575773                       | 0.676773 | 0.758942 | 15.65758 |                                 |      |
| 109          | 0.55034452 | 0.8364782  | 15.6575773                       | 0.788154 | 0.685592 | 15.65758 |                                 |      |
| 110          | 0.58071617 | 0.81963676 | 15.6575773                       | 0.841142 | 0.578848 | 15.65758 |                                 |      |
| 111          | 0.64288144 | 0.76919284 | 15.6575773                       | 0.747221 | 0.712274 | 15.65758 |                                 |      |
| 112          | 0.76962275 | 0.6741102  | 15.6575773                       | 0.779528 | 0.681984 | 15.65758 |                                 |      |
| 113          | 0.74316718 | 0.6962846  | 15.6575773                       | 0.815183 | 0.62824  | 15.65758 |                                 |      |
| 114          | 0.74932054 | 0.7188616  | 15.6575773                       | 0.7221   | 0.740452 | 15.65758 |                                 |      |
| 115          | 0.70768548 | 0.7150471  | 15.6575773                       | 0.741992 | 0.71447  | 15.65758 |                                 |      |
| 116          | 0.64318529 | 0.77146204 | 15.6575773                       | 0.747199 | 0.711697 | 15.65758 |                                 |      |

|     |            |            |            |          |          |          |
|-----|------------|------------|------------|----------|----------|----------|
| 193 | 0.72599161 | 0.74095472 | 15.6575773 | 0.7571   | 0.715478 | 15.65758 |
| 194 | 0.66043078 | 0.75926202 | 15.6575773 | 0.75468  | 0.709712 | 15.65758 |
| 195 | 0.56001772 | 0.83338094 | 15.6575773 | 0.716521 | 0.732976 | 15.65758 |
| 196 | 0.81838675 | 0.60658809 | 15.6575773 | 0.821864 | 0.636654 | 15.65758 |
| 197 | 0.77302519 | 0.63590636 | 15.6575773 | 0.647836 | 0.784919 | 15.65758 |
| 198 | 0.54390926 | 0.84098442 | 15.6575773 | 0.747368 | 0.708886 | 15.65758 |
| 199 | 0.67961129 | 0.75558107 | 15.6575773 | 0.763616 | 0.689703 | 15.65758 |
| 200 | 0.60649215 | 0.7960565  | 15.6575773 | 0.812353 | 0.6419   | 15.65758 |
| 201 | 0.48456997 | 0.87433601 | 15.6575773 | 0.79388  | 0.651875 | 15.65758 |
| 202 | 0.81596176 | 0.64460334 | 15.6575773 | 0.761849 | 0.690674 | 15.65758 |
| 203 | 0.74966186 | 0.66777995 | 15.6575773 | 0.781606 | 0.663368 | 15.65758 |
| 204 | 0.75464334 | 0.65831696 | 15.6575773 | 0.821076 | 0.660814 | 15.65758 |
| 205 | 0.74968041 | 0.72670082 | 15.6575773 | 0.796044 | 0.666209 | 15.65758 |
| 206 | 0.81399703 | 0.58351606 | 15.6575773 | 0.791838 | 0.680987 | 15.65758 |
| 207 | 0.68506628 | 0.75996461 | 15.6575773 | 0.789881 | 0.689701 | 15.65758 |
| 208 | 0.6360702  | 0.78975549 | 15.6575773 | 0.809869 | 0.647442 | 15.65758 |
| 209 | 0.58242464 | 0.81682636 | 15.6575773 | 0.724377 | 0.731891 | 15.65758 |
| 210 | 0.68684771 | 0.75712965 | 15.6575773 | 0.804232 | 0.670361 | 15.65758 |
| 211 | 0.75432658 | 0.70731847 | 15.6575773 | 0.772383 | 0.700347 | 15.65758 |
| 212 | 0.74763336 | 0.70352207 | 15.6575773 | 0.79732  | 0.668725 | 15.65758 |
| 213 | 0.7345029  | 0.6906848  | 15.6575773 | 0.820374 | 0.643138 | 15.65758 |
| 214 | 0.38555341 | 0.92473625 | 15.6575773 | 0.786387 | 0.671845 | 15.65758 |
| 215 | 0.66480243 | 0.77317655 | 15.6575773 | 0.722954 | 0.725167 | 15.65758 |
| 216 | 0.53238055 | 0.8501063  | 15.6575773 | 0.661335 | 0.76966  | 15.65758 |
| 217 | 0.49614753 | 0.87117367 | 15.6575773 | 0.747917 | 0.713147 | 15.65758 |
| 218 | 0.62848809 | 0.78155805 | 15.6575773 | 0.754777 | 0.713618 | 15.65758 |
| 219 | 0.34756065 | 0.9461676  | 15.6575773 | 0.812003 | 0.672584 | 15.65758 |
| 220 | 0.71911963 | 0.70564645 | 15.6575773 | 0.752694 | 0.706264 | 15.65758 |
| 221 | 0.59834917 | 0.81128019 | 15.6575773 | 0.790308 | 0.685963 | 15.65758 |
| 222 | 0.47498616 | 0.87943216 | 15.6575773 | 0.836905 | 0.637796 | 15.65758 |
| 223 | 0.60689839 | 0.79634132 | 15.6575773 | 0.799052 | 0.669879 | 15.65758 |
| 224 | 0.50019681 | 0.86724432 | 15.6575773 | 0.793398 | 0.663917 | 15.65758 |
| 225 | 0.62729209 | 0.79058412 | 15.6575773 | 0.781364 | 0.688733 | 15.65758 |
| 226 | 0.46225126 | 0.88865426 | 15.6575773 | 0.780071 | 0.690821 | 15.65758 |
| 227 | 0.67231135 | 0.76832341 | 15.6575773 | 0.787926 | 0.675839 | 15.65758 |
| 228 | 0.64748332 | 0.76768051 | 15.6575773 | 0.82181  | 0.631713 | 15.65758 |
| 229 | 0.62251406 | 0.78420097 | 15.6575773 | 0.843974 | 0.604237 | 15.65758 |
| 230 | 0.8183653  | 0.67757687 | 15.6575773 | 0.731429 | 0.728452 | 15.65758 |
| 231 | 0.75270747 | 0.71496551 | 15.6575773 | 0.763006 | 0.705997 | 15.65758 |
| 232 | 0.6068207  | 0.79963664 | 15.6575773 | 0.74788  | 0.711903 | 15.65758 |
| 233 | 0.58879924 | 0.8080764  | 15.6575773 | 0.750129 | 0.707874 | 15.65758 |
| 234 | 0.19851404 | 1.02630196 | 2          | 0.796418 | 0.649542 | 15.65758 |
| 235 | 0.71390061 | 0.74582221 | 15.6575773 | 0.719688 | 0.729439 | 15.65758 |
| 236 | 0.76283788 | 0.68148595 | 15.6575773 | 0.76701  | 0.698827 | 15.65758 |
| 237 | 0.60732441 | 0.79707316 | 15.6575773 | 0.557045 | 0.836521 | 15.65758 |
| 238 | 0.54137454 | 0.84031461 | 15.6575773 | 0.786279 | 0.675397 | 15.65758 |
| 239 | 0.57237844 | 0.82061417 | 15.6575773 | 0.772489 | 0.694027 | 15.65758 |
| 240 | 0.89292037 | 0.45411744 | 15.6575773 | 0.791821 | 0.645896 | 15.65758 |
| 241 | 0.65583111 | 0.75916878 | 15.6575773 | 0.725282 | 0.728549 | 15.65758 |
| 242 | 0.774149   | 0.70954979 | 15.6575773 | 0.835758 | 0.615321 | 15.65758 |
| 243 | 0.67806547 | 0.76133731 | 15.6575773 | 0.749561 | 0.716408 | 15.65758 |
| 244 | 0.49364517 | 0.86885487 | 15.6575773 | 0.667615 | 0.773075 | 15.65758 |
| 245 | 0.536933   | 0.84322847 | 15.6575773 | 0.765581 | 0.683119 | 15.65758 |
| 246 | 0.70872418 | 0.7076122  | 15.6575773 | 0.734532 | 0.72122  | 15.65758 |
| 247 | 0.77589014 | 0.67296294 | 15.6575773 | 0.674216 | 0.766718 | 15.65758 |
| 248 | 0.80072619 | 0.61393943 | 15.6575773 | 0.803479 | 0.666537 | 15.65758 |
| 249 | 0.65988256 | 0.77526385 | 15.6575773 | 0.787501 | 0.678435 | 15.65758 |
| 250 | 0.68068467 | 0.74091501 | 15.6575773 | 0.76172  | 0.703398 | 15.65758 |
| 251 | 0.73244551 | 0.70928926 | 15.6575773 | 0.795979 | 0.678793 | 15.65758 |
| 252 | 0.75354693 | 0.67422913 | 15.6575773 | 0.776025 | 0.688462 | 15.65758 |
| 253 | 0.63254677 | 0.79478404 | 15.6575773 | 0.798442 | 0.680254 | 15.65758 |
| 254 | 0.6153526  | 0.79113624 | 15.6575773 | 0.738534 | 0.71802  | 15.65758 |
| 255 | 0.56034604 | 0.82753621 | 15.6575773 | 0.787161 | 0.676819 | 15.65758 |
| 256 | 0.77369824 | 0.65969904 | 15.6575773 | 0.744086 | 0.717224 | 15.65758 |
| 257 | 0.85411372 | 0.56176758 | 15.6575773 | 0.786093 | 0.66527  | 15.65758 |
| 258 | 0.57687458 | 0.81685974 | 15.6575773 | 0.801868 | 0.644505 | 15.65758 |
| 259 | 0.69854543 | 0.73007923 | 15.6575773 | 0.735325 | 0.72027  | 15.65758 |
| 260 | 0.26945451 | 0.97889818 | 15.6575773 | 0.820929 | 0.652595 | 15.65758 |
| 261 | 0.84318789 | 0.58198357 | 15.6575773 | 0.742597 | 0.714365 | 15.65758 |
| 262 | 0.69618896 | 0.75954336 | 15.6575773 | 0.81396  | 0.632136 | 15.65758 |
| 263 | 0.44164111 | 0.89711777 | 15.6575773 | 0.825774 | 0.638587 | 15.65758 |
| 264 | 0.63749278 | 0.78479043 | 15.6575773 | 0.705999 | 0.744879 | 15.65758 |
| 265 | 0.86949088 | 0.57450335 | 15.6575773 | 0.817806 | 0.658609 | 15.65758 |
| 266 | 0.8281639  | 0.5636942  | 15.6575773 | 0.768556 | 0.680677 | 15.65758 |
| 267 | 0.66002965 | 0.75860091 | 15.6575773 | 0.849624 | 0.608813 | 15.65758 |
| 268 | 0.75685307 | 0.71151029 | 15.6575773 | 0.737617 | 0.723191 | 15.65758 |
| 269 | 0.57332907 | 0.82288263 | 15.6575773 | 0.710483 | 0.723503 | 15.65758 |
| 270 | 0.84539899 | 0.59464806 | 15.6575773 | 0.784225 | 0.68118  | 15.65758 |
| 271 | 0.76104507 | 0.65077789 | 15.6575773 | 0.728    | 0.728922 | 15.65758 |
| 272 | 0.6640011  | 0.76063509 | 15.6575773 | 0.740465 | 0.716417 | 15.65758 |
| 273 | 0.66142851 | 0.75573128 | 15.6575773 | 0.792563 | 0.679757 | 15.65758 |
| 274 | 0.09561775 | 1.06392067 | 0.92081875 | 0.804311 | 0.656906 | 15.65758 |
| 275 | 0.59691428 | 0.81195173 | 15.6575773 | 0.764963 | 0.695617 | 15.65758 |
| 276 | 0.66214351 | 0.77044357 | 15.6575773 | 0.796255 | 0.672442 | 15.65758 |
| 277 | 0.77865783 | 0.65298519 | 15.6575773 | 0.827325 | 0.657303 | 15.65758 |
| 278 | 0.54618294 | 0.84078972 | 15.6575773 | 0.662821 | 0.768781 | 15.65758 |
| 279 | 0.6933973  | 0.73413878 | 15.6575773 | 0.762835 | 0.700561 | 15.65758 |
| 280 | 0.68076046 | 0.7351417  | 15.6575773 | 0.751751 | 0.695009 | 15.65758 |
| 281 | 0.64173496 | 0.7808481  | 15.6575773 | 0.738474 | 0.711002 | 15.65758 |
| 282 | 0.62576569 | 0.80111043 | 15.6575773 | 0.816107 | 0.653223 | 15.65758 |
| 283 | 0.7198404  | 0.69761934 | 15.6575773 | 0.775223 | 0.682029 | 15.65758 |
| 284 | 0.55056818 | 0.83413069 | 15.6575773 | 0.836076 | 0.628891 | 15.65758 |
| 285 | 0.70713266 | 0.71949422 | 15.6575773 | 0.751681 | 0.701574 | 15.65758 |
| 286 | 0.42489912 | 0.90477606 | 15.6575773 | 0.783174 | 0.692962 | 15.65758 |
| 287 | 0.731716   | 0.71285487 | 15.6575773 | 0.768599 | 0.690812 | 15.65758 |
| 288 | 0.81458549 | 0.62653519 | 15.6575773 | 0.741483 | 0.706972 | 15.65758 |
| 289 | 0.66883619 | 0.74993247 | 15.6575773 | 0.779969 | 0.693146 | 15.65758 |
| 290 | 0.59842802 | 0.80157266 | 15.6575773 | 0.68451  | 0.759285 | 15.65758 |
| 291 | 0.65410643 | 0.77468509 | 15.6575773 | 0.818814 | 0.645443 | 15.65758 |
| 292 | 0.71982128 | 0.70302377 | 15.6575773 | 0.748352 | 0.713861 | 15.65758 |
| 293 | 0.84054467 | 0.58340764 | 15.6575773 | 0.772643 | 0.689538 | 15.65758 |
| 294 | 0.65200613 | 0.78014444 | 15.6575773 | 0.682554 | 0.758181 | 15.65758 |
| 295 | 0.43740953 | 0.8993488  | 15.6575773 | 0.764508 | 0.673325 | 15.65758 |

|     |            |            |            |          |          |          |
|-----|------------|------------|------------|----------|----------|----------|
| 296 | 0.69769203 | 0.74067558 | 15.6575773 | 0.73447  | 0.722677 | 15.65758 |
| 297 | 0.62942763 | 0.79526233 | 15.6575773 | 0.704265 | 0.722765 | 15.65758 |
| 298 | 0.34273059 | 0.95188053 | 15.6575773 | 0.757274 | 0.714485 | 15.65758 |
| 299 | 0.86048091 | 0.54256793 | 15.6575773 | 0.841756 | 0.592278 | 15.65758 |
| 300 | 0.61614358 | 0.79170506 | 15.6575773 | 0.800507 | 0.654171 | 15.65758 |
| 301 | 0.67335919 | 0.75445336 | 15.6575773 | 0.770732 | 0.701699 | 15.65758 |
| 302 | 0.35345743 | 0.94275013 | 15.6575773 | 0.678785 | 0.698409 | 15.65758 |
| 303 | 0.71042911 | 0.74494089 | 15.6575773 | 0.767138 | 0.701982 | 15.65758 |
| 304 | 0.8477898  | 0.53334989 | 15.6575773 | 0.864484 | 0.58774  | 15.65758 |
| 305 | 0.67903314 | 0.73579422 | 15.6575773 | 0.731853 | 0.725057 | 15.65758 |
| 306 | 0.63507411 | 0.79044464 | 15.6575773 | 0.737426 | 0.715749 | 15.65758 |
| 307 | 0.64005978 | 0.78176292 | 15.6575773 | 0.77896  | 0.686587 | 15.65758 |
| 308 | 0.66719365 | 0.75715937 | 15.6575773 | 0.671694 | 0.759826 | 15.65758 |
| 309 | 0.68957512 | 0.75765528 | 15.6575773 | 0.765302 | 0.716508 | 15.65758 |
| 310 | 0.48493149 | 0.88565917 | 15.6575773 | 0.756836 | 0.700051 | 15.65758 |
| 311 | 0.39856453 | 0.92223475 | 15.6575773 | 0.758049 | 0.707652 | 15.65758 |
| 312 | 0.78137492 | 0.66483924 | 15.6575773 | 0.790423 | 0.68897  | 15.65758 |
| 313 | 0.78942621 | 0.64359881 | 15.6575773 | 0.814714 | 0.667971 | 15.65758 |
| 314 | 0.76627041 | 0.66710032 | 15.6575773 | 0.824011 | 0.654317 | 15.65758 |
| 315 | 0.825058   | 0.58586794 | 15.6575773 | 0.811953 | 0.63457  | 15.65758 |
| 316 | 0.69565437 | 0.72924025 | 15.6575773 | 0.736519 | 0.721321 | 15.65758 |
| 317 | 0.61540866 | 0.79928767 | 15.6575773 | 0.817248 | 0.628069 | 15.65758 |
| 318 | 0.67771209 | 0.75088031 | 15.6575773 | 0.70467  | 0.746934 | 15.65758 |
| 319 | 0.52363313 | 0.85124364 | 15.6575773 | 0.75058  | 0.71488  | 15.65758 |
| 320 | 0.87085539 | 0.54369011 | 15.6575773 |          |          |          |

|     |            |            |           |          |          |           |
|-----|------------|------------|-----------|----------|----------|-----------|
| 399 | 0.75380773 | 0.69201404 | 15.657573 | 0.754296 | 0.710553 | 15.657578 |
| 400 | 0.70056472 | 0.73641256 | 15.657573 | 0.828156 | 0.62062  | 15.657578 |
| 401 | 0.30317843 | 0.97100511 | 15.657573 | 0.744932 | 0.720282 | 15.657578 |
| 402 | 0.42704837 | 0.90400651 | 15.657573 | 0.760689 | 0.697853 | 15.657578 |
| 403 | 0.73250295 | 0.68569706 | 15.657573 | 0.743454 | 0.716956 | 15.657578 |
| 404 | 0.63998157 | 0.77148253 | 15.657573 | 0.797208 | 0.674443 | 15.657578 |
| 405 | 0.18982386 | 1.02679717 | 2         | 0.803261 | 0.64979  | 15.657578 |
| 406 | 0.83707936 | 0.55007538 | 15.657573 | 0.767848 | 0.693432 | 15.657578 |
| 407 | 0.74339517 | 0.67975992 | 15.657573 | 0.833875 | 0.634358 | 15.657578 |
| 408 | 0.74793287 | 0.67889893 | 15.657573 | 0.820188 | 0.623863 | 15.657578 |
| 409 | 0.70750911 | 0.71679886 | 15.657573 | 0.824295 | 0.654846 | 15.657578 |
| 410 | 0.77867297 | 0.67583158 | 15.657573 | 0.700145 | 0.749118 | 15.657578 |
| 411 | 0.69289092 | 0.7567346  | 15.657573 | 0.787082 | 0.681237 | 15.657578 |
| 412 | 0.83317722 | 0.56288769 | 15.657573 | 0.789655 | 0.679567 | 15.657578 |
| 413 | 0.70542758 | 0.74607318 | 15.657573 | 0.818843 | 0.651949 | 15.657578 |
| 414 | 0.60418303 | 0.81035751 | 15.657573 | 0.788503 | 0.683418 | 15.657578 |
| 415 | 0.77263732 | 0.68624395 | 15.657573 | 0.749337 | 0.713422 | 15.657578 |
| 416 | 0.77999501 | 0.64430522 | 15.657573 | 0.857768 | 0.596827 | 15.657578 |
| 417 | 0.65819066 | 0.76349394 | 15.657573 | 0.721292 | 0.738618 | 15.657578 |
| 418 | 0.84534771 | 0.61412027 | 15.657573 | 0.742444 | 0.719647 | 15.657578 |
| 419 | 0.72107122 | 0.74360552 | 15.657573 | 0.756215 | 0.697051 | 15.657578 |
| 420 | 0.69186243 | 0.76327487 | 15.657573 | 0.823636 | 0.661281 | 15.657578 |
| 421 | 0.67704186 | 0.7557326  | 15.657573 | 0.824067 | 0.644177 | 15.657578 |
| 422 | 0.61801931 | 0.79213051 | 15.657573 | 0.838228 | 0.606988 | 15.657578 |
| 423 | 0.39774019 | 0.92016505 | 15.657573 | 0.826148 | 0.66437  | 15.657578 |
| 424 | 0.66275127 | 0.76451426 | 15.657573 | 0.764849 | 0.688124 | 15.657578 |
| 425 | 0.86750801 | 0.54605993 | 15.657573 | 0.750045 | 0.692775 | 15.657578 |
| 426 | 0.65224792 | 0.76255366 | 15.657573 | 0.71395  | 0.738439 | 15.657578 |
| 427 | 0.70968908 | 0.70488503 | 15.657573 | 0.812222 | 0.649952 | 15.657578 |
| 428 | 0.8144281  | 0.61899063 | 15.657573 | 0.794581 | 0.670675 | 15.657578 |
| 429 | 0.55162367 | 0.8352793  | 15.657573 | 0.711564 | 0.739971 | 15.657578 |
| 430 | 0.81451033 | 0.65313459 | 15.657573 | 0.774304 | 0.687878 | 15.657578 |
| 431 | 0.64322032 | 0.76959099 | 15.657573 | 0.815513 | 0.651896 | 15.657578 |
| 432 | 0.76139424 | 0.65253894 | 15.657573 | 0.699841 | 0.747594 | 15.657578 |
| 433 | 0.70921862 | 0.72550022 | 15.657573 | 0.811825 | 0.637925 | 15.657578 |
| 434 | 0.57747588 | 0.82639924 | 15.657573 | 0.759339 | 0.701199 | 15.657578 |
| 435 | 0.71591986 | 0.72409077 | 15.657573 | 0.72731  | 0.729214 | 15.657578 |
| 436 | 0.47779155 | 0.880142   | 15.657573 | 0.834849 | 0.618359 | 15.657578 |
| 437 | 0.49645427 | 0.86737501 | 15.657573 | 0.791193 | 0.687659 | 15.657578 |
| 438 | 0.57743264 | 0.82305894 | 15.657573 | 0.640255 | 0.78536  | 15.657578 |
| 439 | 0.72408992 | 0.73562376 | 15.657573 | 0.747989 | 0.71532  | 15.657578 |
| 440 | 0.65438578 | 0.76223506 | 15.657573 | 0.775596 | 0.682084 | 15.657578 |
| 441 | 0.77561601 | 0.673137   | 15.657573 | 0.664528 | 0.77254  | 15.657578 |
| 442 | 0.65915061 | 0.75561091 | 15.657573 | 0.744109 | 0.702744 | 15.657578 |
| 443 | 0.64163782 | 0.78081529 | 15.657573 | 0.823738 | 0.662318 | 15.657578 |
| 444 | 0.63293546 | 0.78185073 | 15.657573 | 0.728052 | 0.732315 | 15.657578 |
| 445 | 0.47748474 | 0.87907839 | 15.657573 | 0.704574 | 0.745085 | 15.657578 |
| 446 | 0.79135335 | 0.64989083 | 15.657573 | 0.723887 | 0.731429 | 15.657578 |
| 447 | 0.78444278 | 0.66513336 | 15.657573 | 0.794666 | 0.671867 | 15.657578 |
| 448 | 0.66124032 | 0.75088453 | 15.657573 | 0.836126 | 0.613719 | 15.657578 |
| 449 | 0.84725654 | 0.57327395 | 15.657573 | 0.755826 | 0.700347 | 15.657578 |
| 450 | 0.6443371  | 0.78954395 | 15.657573 | 0.75978  | 0.715384 | 15.657578 |
| 451 | 0.64475131 | 0.76588908 | 15.657573 | 0.770362 | 0.669441 | 15.657578 |
| 452 | 0.74418936 | 0.67489822 | 15.657573 | 0.859397 | 0.585868 | 15.657578 |
| 453 | 0.72247041 | 0.72688859 | 15.657573 | 0.762756 | 0.700346 | 15.657578 |
| 454 | 0.51252129 | 0.86008798 | 15.657573 | 0.743388 | 0.722329 | 15.657578 |
| 455 | 0.22879971 | 1.04332886 | 15.657573 | 0.758161 | 0.713607 | 15.657578 |
| 456 | 0.49451615 | 0.86879374 | 15.657573 | 0.784977 | 0.667649 | 15.657578 |
| 457 | 0.61730463 | 0.79382221 | 15.657573 | 0.809956 | 0.658432 | 15.657578 |
| 458 | 0.72501316 | 0.74525514 | 15.657573 | 0.803999 | 0.652058 | 15.657578 |
| 459 | 0.69454045 | 0.74727283 | 15.657573 | 0.788514 | 0.685062 | 15.657578 |
| 460 | 0.63909089 | 0.77040152 | 15.657573 | 0.765208 | 0.705671 | 15.657578 |
| 461 | 0.66181163 | 0.75262712 | 15.657573 | 0.787266 | 0.667723 | 15.657578 |
| 462 | 0.55251219 | 0.83822132 | 15.657573 | 0.829424 | 0.64137  | 15.657578 |
| 463 | 0.80513944 | 0.68464999 | 15.657573 | 0.744724 | 0.711264 | 15.657578 |
| 464 | 0.70250859 | 0.73723254 | 15.657573 | 0.768015 | 0.701385 | 15.657578 |
| 465 | 0.59414622 | 0.80920074 | 15.657573 | 0.848811 | 0.622095 | 15.657578 |
| 466 | 0.61966274 | 0.78486906 | 15.657573 | 0.796293 | 0.662787 | 15.657578 |
| 467 | 0.52473404 | 0.85249113 | 15.657573 | 0.808454 | 0.671259 | 15.657578 |
| 468 | 0.60496308 | 0.80896415 | 15.657573 | 0.742548 | 0.721366 | 15.657578 |
| 469 | 0.61949589 | 0.79070222 | 15.657573 | 0.811742 | 0.669353 | 15.657578 |
| 470 | 0.69907747 | 0.73108434 | 15.657573 | 0.73915  | 0.723346 | 15.657578 |
| 471 | 0.74682731 | 0.72107425 | 15.657573 | 0.754893 | 0.717161 | 15.657578 |
| 472 | 0.68695287 | 0.72899135 | 15.657573 | 0.782761 | 0.691515 | 15.657578 |
| 473 | 0.70027547 | 0.74764463 | 15.657573 | 0.76757  | 0.691957 | 15.657578 |
| 474 | 0.67665174 | 0.74817816 | 15.657573 | 0.78047  | 0.692034 | 15.657578 |
| 475 | 0.73865186 | 0.68108967 | 15.657573 | 0.859199 | 0.559392 | 15.657578 |
| 476 | 0.52289529 | 0.85180319 | 15.657573 | 0.668443 | 0.768252 | 15.657578 |
| 477 | 0.33180736 | 0.95022672 | 15.657573 | 0.716968 | 0.732784 | 15.657578 |
| 478 | 0.59534322 | 0.81261156 | 15.657573 | 0.815329 | 0.652696 | 15.657578 |
| 479 | 0.702301   | 0.72743886 | 15.657573 | 0.803292 | 0.672427 | 15.657578 |
| 480 | 0.76350165 | 0.70133905 | 15.657573 | 0.790684 | 0.678166 | 15.657578 |
| 481 | 0.77611628 | 0.7048954  | 15.657573 | 0.80878  | 0.667171 | 15.657578 |
| 482 | 0.71592386 | 0.69943891 | 15.657573 | 0.797176 | 0.647981 | 15.657578 |
| 483 | 0.7804117  | 0.67984787 | 15.657573 | 0.75695  | 0.702238 | 15.657578 |
| 484 | 0.85593272 | 0.61143133 | 15.657573 | 0.770794 | 0.690627 | 15.657578 |
| 485 | 0.74228279 | 0.7278532  | 15.657573 | 0.828818 | 0.628046 | 15.657578 |
| 486 | 0.60588402 | 0.80759028 | 15.657573 | 0.763802 | 0.697486 | 15.657578 |
| 487 | 0.71823562 | 0.70427794 | 15.657573 | 0.801204 | 0.669957 | 15.657578 |
| 488 | 0.6636924  | 0.77504323 | 15.657573 | 0.759127 | 0.700359 | 15.657578 |
| 489 | 0.69713735 | 0.73683862 | 15.657573 | 0.759708 | 0.706338 | 15.657578 |
| 490 | 0.67121011 | 0.77080842 | 15.657573 | 0.710417 | 0.741314 | 15.657578 |
| 491 | 0.78699172 | 0.64169254 | 15.657573 | 0.797238 | 0.676997 | 15.657578 |
| 492 | 0.60100456 | 0.81047883 | 15.657573 | 0.761262 | 0.706335 | 15.657578 |
| 493 | 0.81389203 | 0.64419667 | 15.657573 | 0.764715 | 0.697881 | 15.657578 |
| 494 | 0.65987459 | 0.77273028 | 15.657573 | 0.770325 | 0.700429 | 15.657578 |
| 495 | 0.699245   | 0.74799964 | 15.657573 | 0.851678 | 0.599122 | 15.657578 |
| 496 | 0.79823767 | 0.65839407 | 15.657573 | 0.760197 | 0.694588 | 15.657578 |
| 497 | 0.29238768 | 0.97692468 | 15.657573 | 0.72815  | 0.720757 | 15.657578 |
| 498 | 0.44636892 | 0.89441426 | 15.657573 | 0.756012 | 0.713311 | 15.657578 |
| 499 | 0.73933841 | 0.70345159 | 15.657573 | 0.797833 | 0.682087 | 15.657578 |
| 500 | 0.58807227 | 0.81453685 | 15.657573 | 0.714215 | 0.734489 | 15.657578 |
| 501 | 0.77527752 | 0.71043088 | 15.657573 | 0.710306 | 0.745301 | 15.657578 |

|     |            |            |           |          |          |           |
|-----|------------|------------|-----------|----------|----------|-----------|
| 502 | 0.68434553 | 0.74872971 | 15.657573 | 0.709174 | 0.745781 | 15.657578 |
| 503 | 0.83047442 | 0.65821388 | 15.657573 | 0.872401 | 0.59495  | 15.657578 |
| 504 | 0.6976008  | 0.72715378 | 15.657573 | 0.756366 | 0.70927  | 15.657578 |
| 505 | 0.45165395 | 0.89565841 | 15.657573 | 0.795147 | 0.685827 | 15.657578 |
| 506 | 0.79364162 | 0.68147898 | 15.657573 | 0.821229 | 0.585546 | 15.657578 |
| 507 | 0.72811617 | 0.69173956 | 15.657573 | 0.735752 | 0.722935 | 15.657578 |
| 508 | 0.3902897  | 0.92240038 | 15.657573 | 0.735647 | 0.712962 | 15.657578 |
| 509 | 0.67516731 | 0.76343468 | 15.657573 | 0.731546 | 0.696748 | 15.657578 |
| 510 | 0.75947913 | 0.70850583 | 15.657573 | 0.647702 | 0.782054 | 15.657578 |
| 511 | 0.68924142 | 0.75321705 | 15.657573 | 0.786892 | 0.686214 | 15.657578 |
| 512 | 0.6297176  | 0.785607   | 15.657573 | 0.719129 | 0.72712  | 15.657578 |
| 513 | 0.72722106 | 0.72063911 | 15.657573 | 0.695228 | 0.754684 | 15.657578 |
| 514 | 0.68145715 | 0.74036507 | 15.657573 | 0.74899  | 0.716309 | 15.657578 |
| 515 | 0.51438259 | 0.85866594 | 15.657573 | 0.796234 | 0.651528 | 15.657578 |
| 516 | 0.43424789 | 0.9026355  | 15.657573 | 0.795587 | 0.655116 | 15.657578 |
| 517 | 0.71897431 | 0.7125138  | 15.657573 | 0.754364 | 0.699159 | 15.657578 |
| 518 | 0.71162204 | 0.73098453 | 15.657573 | 0.805346 | 0.654452 | 15.657578 |
| 519 | 0.67510939 | 0.74560581 | 15.657573 | 0.716585 | 0.739683 | 15.657578 |
| 520 | 0.55766011 | 0.83863379 | 15.657573 | 0.882547 | 0.567297 | 15.657578 |
| 521 | 0.59129059 | 0.80753152 | 15.657573 | 0.856421 | 0.604516 | 15.657578 |
| 522 | 0.74657949 | 0.66745387 | 15.657573 | 0.828337 | 0.626874 | 15.657578 |
| 523 | 0.7467179  | 0.6935483  | 15.657573 | 0.687775 | 0.763916 | 15.657578 |
| 524 | 0.5065352  | 0.86178731 | 15.657573 | 0.847128 | 0.638282 | 15.657578 |
| 525 | 0.78742553 | 0.69741061 | 15.657573 | 0.733981 | 0.721383 | 15.657578 |
| 526 | 0.66099005 | 0.75171893 | 15        |          |          |           |

|     |          |          |          |
|-----|----------|----------|----------|
| 605 | 0.836401 | 0.628687 | 15.65758 |
| 606 | 0.911251 | 0.419262 | 15.65758 |
| 607 | 0.818817 | 0.6423   | 15.65758 |
| 608 | 0.815959 | 0.587867 | 15.65758 |
| 609 | 0.775377 | 0.701169 | 15.65758 |
| 610 | 0.810637 | 0.676703 | 15.65758 |
| 611 | 0.783418 | 0.686293 | 15.65758 |
| 612 | 0.827488 | 0.651619 | 15.65758 |
| 613 | 0.830243 | 0.633429 | 15.65758 |
| 614 | 0.76299  | 0.706539 | 15.65758 |
| 615 | 0.777326 | 0.683108 | 15.65758 |
| 616 | 0.792992 | 0.688547 | 15.65758 |
| 617 | 0.791698 | 0.667083 | 15.65758 |
| 618 | 0.746328 | 0.709129 | 15.65758 |
| 619 | 0.824635 | 0.653013 | 15.65758 |
| 620 | 0.780386 | 0.695657 | 15.65758 |
| 621 | 0.890327 | 0.548828 | 15.65758 |
| 622 | 0.765789 | 0.695786 | 15.65758 |
| 623 | 0.793323 | 0.67593  | 15.65758 |
| 624 | 0.799253 | 0.685113 | 15.65758 |
| 625 | 0.707269 | 0.713864 | 15.65758 |
| 626 | 0.815809 | 0.659695 | 15.65758 |
| 627 | 0.756838 | 0.708618 | 15.65758 |
| 628 | 0.758913 | 0.712994 | 15.65758 |
| 629 | 0.806806 | 0.670664 | 15.65758 |
| 630 | 0.725551 | 0.702166 | 15.65758 |
| 631 | 0.789219 | 0.677406 | 15.65758 |
| 632 | 0.798177 | 0.671401 | 15.65758 |
| 633 | 0.771027 | 0.67813  | 15.65758 |
| 634 | 0.809229 | 0.666031 | 15.65758 |
| 635 | 0.752316 | 0.7117   | 15.65758 |
| 636 | 0.745579 | 0.711261 | 15.65758 |
| 637 | 0.745375 | 0.717513 | 15.65758 |
| 638 | 0.828201 | 0.622256 | 15.65758 |
| 639 | 0.819101 | 0.644291 | 15.65758 |
| 640 | 0.783208 | 0.690717 | 15.65758 |
| 641 | 0.639238 | 0.786195 | 15.65758 |
| 642 | 0.728835 | 0.728735 | 15.65758 |
| 643 | 0.5941   | 0.810263 | 15.65758 |
| 644 | 0.743587 | 0.716656 | 15.65758 |
| 645 | 0.819951 | 0.659432 | 15.65758 |
| 646 | 0.71859  | 0.736019 | 15.65758 |
| 647 | 0.817048 | 0.659215 | 15.65758 |
| 648 | 0.814462 | 0.666707 | 15.65758 |
| 649 | 0.737011 | 0.71207  | 15.65758 |
| 650 | 0.751921 | 0.716585 | 15.65758 |
| 651 | 0.771256 | 0.690252 | 15.65758 |
| 652 | 0.779024 | 0.688401 | 15.65758 |
| 653 | 0.784727 | 0.669316 | 15.65758 |
| 654 | 0.763146 | 0.688507 | 15.65758 |
| 655 | 0.761684 | 0.700649 | 15.65758 |
| 656 | 0.744078 | 0.718388 | 15.65758 |
| 657 | 0.839238 | 0.631888 | 15.65758 |
| 658 | 0.712365 | 0.70875  | 15.65758 |
| 659 | 0.781958 | 0.696883 | 15.65758 |
| 660 | 0.764964 | 0.708114 | 15.65758 |
| 661 | 0.781655 | 0.694766 | 15.65758 |
| 662 | 0.88273  | 0.513199 | 15.65758 |
| 663 | 0.708519 | 0.743325 | 15.65758 |
| 664 | 0.78099  | 0.685178 | 15.65758 |
| 665 | 0.705255 | 0.723169 | 15.65758 |
| 666 | 0.78502  | 0.685646 | 15.65758 |
| 667 | 0.696065 | 0.734747 | 15.65758 |
| 668 | 0.832355 | 0.645889 | 15.65758 |
| 669 | 0.687384 | 0.756173 | 15.65758 |
| 670 | 0.778759 | 0.689232 | 15.65758 |
| 671 | 0.739144 | 0.727058 | 15.65758 |
| 672 | 0.766936 | 0.700403 | 15.65758 |
| 673 | 0.831052 | 0.656697 | 15.65758 |
| 674 | 0.76816  | 0.703657 | 15.65758 |
| 675 | 0.80481  | 0.656479 | 15.65758 |
| 676 | 0.830248 | 0.662945 | 15.65758 |
| 677 | 0.799644 | 0.675043 | 15.65758 |
| 678 | 0.755421 | 0.682801 | 15.65758 |
| 679 | 0.807969 | 0.663481 | 15.65758 |
| 680 | 0.778601 | 0.703357 | 15.65758 |
| 681 | 0.678404 | 0.759408 | 15.65758 |
| 682 | 0.844275 | 0.562663 | 15.65758 |
| 683 | 0.771829 | 0.692486 | 15.65758 |
| 684 | 0.827057 | 0.658848 | 15.65758 |
| 685 | 0.8889   | 0.520816 | 15.65758 |
| 686 | 0.779557 | 0.685926 | 15.65758 |
| 687 | 0.826954 | 0.656704 | 15.65758 |
| 688 | 0.769125 | 0.699903 | 15.65758 |
| 689 | 0.881961 | 0.496594 | 15.65758 |
| 690 | 0.710025 | 0.745151 | 15.65758 |
| 691 | 0.815741 | 0.637419 | 15.65758 |
| 692 | 0.864562 | 0.58562  | 15.65758 |
| 693 | 0.731239 | 0.725962 | 15.65758 |
| 694 | 0.725731 | 0.733802 | 15.65758 |
| 695 | 0.809398 | 0.650864 | 15.65758 |
| 696 | 0.844813 | 0.629186 | 15.65758 |
| 697 | 0.772659 | 0.696847 | 15.65758 |
| 698 | 0.785803 | 0.684959 | 15.65758 |
| 699 | 0.875638 | 0.559683 | 15.65758 |
| 700 | 0.745452 | 0.708584 | 15.65758 |
| 701 | 0.629989 | 0.794424 | 15.65758 |
| 702 | 0.814794 | 0.658299 | 15.65758 |
| 703 | 0.755485 | 0.715518 | 15.65758 |
| 704 | 0.831513 | 0.634615 | 15.65758 |
| 705 | 0.852114 | 0.583726 | 15.65758 |
| 706 | 0.849181 | 0.608123 | 15.65758 |
| 707 | 0.766739 | 0.672542 | 15.65758 |

|     |          |          |          |
|-----|----------|----------|----------|
| 708 | 0.687113 | 0.751077 | 15.65758 |
| 709 | 0.775649 | 0.668987 | 15.65758 |
| 710 | 0.73186  | 0.728451 | 15.65758 |
| 711 | 0.794779 | 0.668587 | 15.65758 |
| 712 | 0.746058 | 0.714136 | 15.65758 |
| 713 | 0.783579 | 0.684422 | 15.65758 |
| 714 | 0.793903 | 0.623058 | 15.65758 |
| 715 | 0.797154 | 0.664462 | 15.65758 |
| 716 | 0.829359 | 0.654034 | 15.65758 |
| 717 | 0.794461 | 0.67782  | 15.65758 |
| 718 | 0.746753 | 0.713377 | 15.65758 |
| 719 | 0.764302 | 0.709912 | 15.65758 |
| 720 | 0.821783 | 0.669849 | 15.65758 |
| 721 | 0.600036 | 0.803218 | 15.65758 |
| 722 | 0.773492 | 0.697938 | 15.65758 |
| 723 | 0.748952 | 0.708535 | 15.65758 |
| 724 | 0.802202 | 0.669293 | 15.65758 |
| 725 | 0.872055 | 0.608634 | 15.65758 |
| 726 | 0.821294 | 0.652607 | 15.65758 |
| 727 | 0.726352 | 0.722836 | 15.65758 |
| 728 | 0.659818 | 0.765166 | 15.65758 |
| 729 | 0.782503 | 0.684321 | 15.65758 |
| 730 | 0.688529 | 0.744634 | 15.65758 |
| 731 | 0.773486 | 0.705232 | 15.65758 |
| 732 | 0.691429 | 0.749325 | 15.65758 |
| 733 | 0.71483  | 0.729752 | 15.65758 |
| 734 | 0.78104  | 0.684301 | 15.65758 |
| 735 | 0.75907  | 0.690635 | 15.65758 |
| 736 | 0.610114 | 0.800979 | 15.65758 |
| 737 | 0.756082 | 0.695542 | 15.65758 |
| 738 | 0.76771  | 0.686997 | 15.65758 |
| 739 | 0.804666 | 0.665904 | 15.65758 |
| 740 | 0.664601 | 0.753398 | 15.65758 |
| 741 | 0.810006 | 0.663316 | 15.65758 |
| 742 | 0.749778 | 0.721999 | 15.65758 |
| 743 | 0.810336 | 0.665186 | 15.65758 |
| 744 | 0.712186 | 0.735793 | 15.65758 |
| 745 | 0.783865 | 0.679325 | 15.65758 |
| 746 | 0.796486 | 0.682023 | 15.65758 |
| 747 | 0.796407 | 0.671123 | 15.65758 |
| 748 | 0.804208 | 0.675282 | 15.65758 |
| 749 | 0.800447 | 0.654541 | 15.65758 |
| 750 | 0.767746 | 0.693829 | 15.65758 |
| 751 | 0.732253 | 0.728506 | 15.65758 |
| 752 | 0.751563 | 0.699475 | 15.65758 |
| 753 | 0.81538  | 0.675123 | 15.65758 |
| 754 | 0.823838 | 0.658771 | 15.65758 |
| 755 | 0.758944 | 0.710429 | 15.65758 |
| 756 | 0.695817 | 0.739976 | 15.65758 |
| 757 | 0.826663 | 0.628033 | 15.65758 |
| 758 | 0.853517 | 0.595221 | 15.65758 |
| 759 | 0.797715 | 0.681695 | 15.65758 |
| 760 | 0.785589 | 0.691973 | 15.65758 |
| 761 | 0.795076 | 0.679921 | 15.65758 |
| 762 | 0.768809 | 0.719103 | 15.65758 |
| 763 | 0.84491  | 0.646007 | 15.65758 |
| 764 | 0.773846 | 0.684647 | 15.65758 |
| 765 | 0.84135  | 0.614592 | 15.65758 |
| 766 | 0.808888 | 0.672955 | 15.65758 |
| 767 | 0.782672 | 0.682618 | 15.65758 |
| 768 | 0.7018   | 0.747612 | 15.65758 |
| 769 | 0.820353 | 0.624411 | 15.65758 |
| 770 | 0.763721 | 0.692248 | 15.65758 |
| 771 | 0.770611 | 0.680024 | 15.65758 |
| 772 | 0.725137 | 0.731628 | 15.65758 |
| 773 | 0.739857 | 0.718038 | 15.65758 |
| 774 | 0.855136 | 0.583444 | 15.65758 |
| 775 | 0.752022 | 0.712958 | 15.65758 |
| 776 | 0.736903 | 0.721651 | 15.65758 |
| 777 | 0.793606 | 0.622588 | 15.65758 |
| 778 | 0.822497 | 0.644963 | 15.65758 |
| 779 | 0.825582 | 0.619915 | 15.65758 |
| 780 | 0.772236 | 0.692406 | 15.65758 |
| 781 | 0.791914 | 0.653098 | 15.65758 |
| 782 | 0.808445 | 0.672087 | 15.65758 |
| 783 | 0.793581 | 0.687456 | 15.65758 |
| 784 | 0.679075 | 0.760631 | 15.65758 |
| 785 | 0.775771 | 0.674573 | 15.65758 |
| 786 | 0.855273 | 0.603479 | 15.65758 |
| 787 | 0.766861 | 0.699522 | 15.65758 |
| 788 | 0.833812 | 0.63632  | 15.65758 |
| 789 | 0.671904 | 0.767981 | 15.65758 |
| 790 | 0.627788 | 0.780373 | 15.65758 |
| 791 | 0.691161 | 0.754252 | 15.65758 |
| 792 | 0.800067 | 0.633382 | 15.65758 |
| 793 | 0.681481 | 0.747214 | 15.65758 |
| 794 | 0.896852 | 0.506732 | 15.65758 |
| 795 | 0.826931 | 0.646884 | 15.65758 |
| 796 | 0.81027  | 0.685558 | 15.65758 |
| 797 | 0.833139 | 0.601492 | 15.65758 |
| 798 | 0.866313 | 0.595174 | 15.65758 |
| 799 | 0.761802 | 0.70396  | 15.65758 |
| 800 | 0.708014 | 0.73629  | 15.65758 |
| 801 | 0.777637 | 0.693333 | 15.65758 |
| 802 | 0.820679 | 0.64775  | 15.65758 |
| 803 | 0.783761 | 0.667992 | 15.65758 |
| 804 | 0.745293 | 0.71143  | 15.65758 |
| 805 | 0.722151 | 0.743919 | 15.65758 |
| 806 | 0.761253 | 0.710745 | 15.65758 |
| 807 | 0.73444  | 0.683018 | 15.65758 |
| 808 | 0.768755 | 0.704782 | 15.65758 |
| 809 | 0.746894 | 0.717701 | 15.65758 |
| 810 | 0.707796 | 0.743212 | 15.65758 |

|     |          |          |          |
|-----|----------|----------|----------|
| 811 | 0.691524 | 0.75594  | 15.65758 |
| 812 | 0.78693  | 0.666508 | 15.65758 |
| 813 | 0.745628 | 0.698497 | 15.65758 |
| 814 | 0.74929  | 0.713002 | 15.65758 |
| 815 | 0.768514 | 0.698464 | 15.65758 |
| 816 | 0.842632 | 0.584736 | 15.65758 |
| 817 | 0.7051   | 0.730224 | 15.65758 |
| 818 | 0.76721  | 0.699879 | 15.65758 |
| 819 | 0.787893 | 0.671389 | 15.65758 |
| 820 | 0.780374 | 0.682974 | 15.65758 |
| 821 | 0.785363 | 0.692493 | 15.65758 |
| 822 | 0.859342 | 0.549345 | 15.65758 |
| 823 | 0.767217 | 0.704088 | 15.65758 |
| 824 | 0.739796 | 0.720221 | 15.65758 |
| 825 | 0.728577 | 0.733938 | 15.65758 |
| 826 | 0.733453 | 0.726341 | 15.65758 |
| 827 | 0.732387 | 0.72961  | 15.65758 |
| 828 | 0.815105 | 0.630482 | 15.65758 |
| 829 | 0.839441 | 0.65636  | 15.65758 |
| 830 | 0.834698 | 0.650292 | 15.65758 |
| 831 | 0.771269 | 0.704258 | 15.65758 |
| 832 | 0.789611 | 0.686827 | 15.65758 |
| 833 | 0.735719 | 0.72393  | 15.65758 |
| 834 | 0.814591 | 0.616849 | 15.65758 |
| 835 | 0.790419 | 0.689815 | 15.65758 |
| 836 | 0.78473  | 0.682878 | 15.65758 |
| 837 | 0.813936 | 0.656387 | 15.65758 |
| 838 | 0.829929 | 0.611358 | 15.65758 |
| 839 | 0.772189 | 0.694661 | 15.65758 |
| 840 | 0.707238 | 0.720096 | 15.65758 |
| 841 | 0.685376 | 0.754889 | 15.65758 |
| 842 | 0.769271 | 0.691431 | 15.65758 |
| 843 | 0.744316 | 0.714659 | 15.65758 |
| 844 | 0.880236 | 0.542133 | 15.65758 |
| 845 | 0.760082 | 0.702195 | 15.65758 |
| 846 | 0.763591 | 0.702477 | 15.65758 |
| 847 | 0.809324 | 0.672497 | 15.65758 |
| 848 | 0.822625 | 0.612721 | 15.65758 |
| 849 | 0.766008 | 0.712739 | 15.65758 |
| 850 | 0.785518 | 0.69913  | 15.65758 |
| 851 | 0.675955 | 0.765904 | 15.65758 |
| 852 | 0.800859 | 0.602692 | 15.65758 |
| 853 | 0.858401 | 0.561668 | 15.65758 |
| 854 | 0.769692 | 0.692131 | 15.65758 |
| 855 | 0.816124 | 0.659429 | 15.65758 |
| 856 | 0.771042 | 0.692388 | 15.65758 |
| 857 | 0.771223 | 0.686221 | 15.65758 |
| 858 | 0.670844 | 0.76087  | 15.65758 |
| 859 | 0.737992 | 0.727044 | 15.65758 |
| 860 | 0.672762 | 0.762582 | 15.65758 |
| 861 | 0.887975 | 0.483904 | 15.65758 |
| 862 | 0.73406  | 0.723293 | 15.65758 |
| 863 | 0.816208 | 0.655008 | 15.65758 |
| 864 | 0.841274 | 0.657643 | 15.65758 |
| 865 | 0.799198 | 0.687463 | 15.65758 |
| 866 | 0.835788 | 0.629502 | 15.65758 |
| 867 | 0.777863 | 0.689189 | 15.65758 |
| 868 | 0.695276 | 0.752255 | 15.65758 |
| 869 | 0.712226 | 0.736885 | 15.65758 |
| 870 | 0.773715 | 0.697803 | 15.65758 |
| 871 | 0.79545  | 0.687114 | 15.65758 |
| 872 | 0.765891 | 0.688616 | 15.65758 |
| 873 | 0.795922 | 0.683263 | 15.65758 |
| 874 | 0.769179 | 0.682906 | 15.65758 |
| 875 | 0.760249 | 0.70093  | 15.65758 |
| 876 | 0.819652 | 0.651266 | 15.65758 |
| 877 | 0.70846  | 0.709759 | 15.65758 |
| 878 | 0.803284 | 0.649877 | 15.65758 |
| 879 | 0.80757  | 0.666417 | 15.65758 |
| 880 | 0.775111 | 0.697829 | 15.65758 |
| 881 | 0.763048 | 0.704407 | 15.65758 |
| 882 | 0.768287 | 0.701009 | 15.65758 |
| 883 | 0.767751 | 0.694695 | 15.65758 |
| 884 | 0.822764 | 0.634876 | 15.65758 |
| 885 | 0.850516 | 0.640262 | 15.65758 |
| 886 | 0.591747 | 0.816696 | 15.65758 |
| 887 | 0.73863  | 0.725974 | 15.65758 |
| 888 | 0.748382 | 0.720216 | 15.65758 |
| 889 | 0.804458 | 0.656342 | 15.65758 |
| 890 | 0.769842 | 0.692604 | 15.65758 |
| 891 | 0.778384 | 0.691461 | 15.65758 |
| 892 | 0.728208 | 0.728898 | 15.65758 |
| 893 | 0.81855  | 0.672021 | 15.65758 |
| 894 | 0.704846 | 0.746881 | 15.65758 |
| 895 | 0.72821  | 0.730615 | 15.65758 |
| 896 | 0.77736  | 0.658292 | 15.65758 |
| 897 | 0.701517 | 0.744183 | 15.65758 |
| 898 | 0.784194 | 0.643621 | 15.65758 |
| 899 | 0.802241 | 0.66083  | 15.65758 |
| 900 | 0.825347 | 0.655826 | 15.65758 |
| 901 | 0.783879 | 0.671634 | 15.65758 |
| 902 | 0.812159 | 0.651685 | 15.65758 |
| 903 | 0.787115 | 0.68212  | 15.65758 |
| 904 | 0.765787 | 0.695202 | 15.65758 |
| 905 | 0.789955 | 0.691247 | 15.65758 |
| 906 | 0.743388 | 0.691064 | 15.65758 |
| 907 | 0.657245 | 0.76763  | 15.65758 |
| 908 | 0.379121 | 0.93263  | 15.65758 |
| 909 | 0.778152 | 0.68659  | 15.65758 |
| 910 | 0.708266 | 0.741077 | 15.65758 |
| 911 | 0.741949 | 0.703251 | 15.65758 |
| 912 | 0.732645 | 0.709869 | 15.65758 |
| 913 | 0.733462 | 0.719083 | 15.65758 |

|      |          |          |          |
|------|----------|----------|----------|
| 914  | 0.716453 | 0.742462 | 15.65758 |
| 915  | 0.654978 | 0.773194 | 15.65758 |
| 916  | 0.625046 | 0.795415 | 15.65758 |
| 917  | 0.714263 | 0.730403 | 15.65758 |
| 918  | 0.770429 | 0.693096 | 15.65758 |
| 919  | 0.749573 | 0.693034 | 15.65758 |
| 920  | 0.772131 | 0.695857 | 15.65758 |
| 921  | 0.766798 | 0.691671 | 15.65758 |
| 922  | 0.756766 | 0.698513 | 15.65758 |
| 923  | 0.640414 | 0.779451 | 15.65758 |
| 924  | 0.750113 | 0.706342 | 15.65758 |
| 925  | 0.719802 | 0.728077 | 15.65758 |
| 926  | 0.777063 | 0.679308 | 15.65758 |
| 927  | 0.663746 | 0.766772 | 15.65758 |
| 928  | 0.719106 | 0.712363 | 15.65758 |
| 929  | 0.751487 | 0.692049 | 15.65758 |
| 930  | 0.790472 | 0.674228 | 15.65758 |
| 931  | 0.605095 | 0.802587 | 15.65758 |
| 932  | 0.755214 | 0.715396 | 15.65758 |
| 933  | 0.697897 | 0.74966  | 15.65758 |
| 934  | 0.785667 | 0.692032 | 15.65758 |
| 935  | 0.739355 | 0.719973 | 15.65758 |
| 936  | 0.741586 | 0.708798 | 15.65758 |
| 937  | 0.771365 | 0.688013 | 15.65758 |
| 938  | 0.740556 | 0.698675 | 15.65758 |
| 939  | 0.696002 | 0.751329 | 15.65758 |
| 940  | 0.806964 | 0.656185 | 15.65758 |
| 941  | 0.681813 | 0.755193 | 15.65758 |
| 942  | 0.668765 | 0.764835 | 15.65758 |
| 943  | 0.677381 | 0.757851 | 15.65758 |
| 944  | 0.751058 | 0.663902 | 15.65758 |
| 945  | 0.732774 | 0.689789 | 15.65758 |
| 946  | 0.67583  | 0.757583 | 15.65758 |
| 947  | 0.771558 | 0.680492 | 15.65758 |
| 948  | 0.697133 | 0.727558 | 15.65758 |
| 949  | 0.810621 | 0.659512 | 15.65758 |
| 950  | 0.784512 | 0.665114 | 15.65758 |
| 951  | 0.840039 | 0.615174 | 15.65758 |
| 952  | 0.694421 | 0.744816 | 15.65758 |
| 953  | 0.712999 | 0.7328   | 15.65758 |
| 954  | 0.838536 | 0.616874 | 15.65758 |
| 955  | 0.65724  | 0.771597 | 15.65758 |
| 956  | 0.744268 | 0.710347 | 15.65758 |
| 957  | 0.729235 | 0.72432  | 15.65758 |
| 958  | 0.70442  | 0.729031 | 15.65758 |
| 959  | 0.775332 | 0.695943 | 15.65758 |
| 960  | 0.630596 | 0.789718 | 15.65758 |
| 961  | 0.701197 | 0.723258 | 15.65758 |
| 962  | 0.806464 | 0.633677 | 15.65758 |
| 963  | 0.703745 | 0.725434 | 15.65758 |
| 964  | 0.582657 | 0.822075 | 15.65758 |
| 965  | 0.700899 | 0.717601 | 15.65758 |
| 966  | 0.696693 | 0.742772 | 15.65758 |
| 967  | 0.720849 | 0.714114 | 15.65758 |
| 968  | 0.716702 | 0.729774 | 15.65758 |
| 969  | 0.756091 | 0.676041 | 15.65758 |
| 970  | 0.761053 | 0.694696 | 15.65758 |
| 971  | 0.825623 | 0.619598 | 15.65758 |
| 972  | 0.760872 | 0.685556 | 15.65758 |
| 973  | 0.767353 | 0.701338 | 15.65758 |
| 974  | 0.751818 | 0.716972 | 15.65758 |
| 975  | 0.672787 | 0.758048 | 15.65758 |
| 976  | 0.70122  | 0.735332 | 15.65758 |
| 977  | 0.548242 | 0.841881 | 15.65758 |
| 978  | 0.653347 | 0.778939 | 15.65758 |
| 979  | 0.657986 | 0.758886 | 15.65758 |
| 980  | 0.693729 | 0.739627 | 15.65758 |
| 981  | 0.75958  | 0.68512  | 15.65758 |
| 982  | 0.787659 | 0.682513 | 15.65758 |
| 983  | 0.783072 | 0.673346 | 15.65758 |
| 984  | 0.852235 | 0.565936 | 15.65758 |
| 985  | 0.756683 | 0.704229 | 15.65758 |
| 986  | 0.776682 | 0.70108  | 15.65758 |
| 987  | 0.744442 | 0.717364 | 15.65758 |
| 988  | 0.705559 | 0.729741 | 15.65758 |
| 989  | 0.691645 | 0.735575 | 15.65758 |
| 990  | 0.766992 | 0.682072 | 15.65758 |
| 991  | 0.723486 | 0.723949 | 15.65758 |
| 992  | 0.624424 | 0.793921 | 15.65758 |
| 993  | 0.224089 | 1.000564 | 15.65758 |
| 994  | 0.742459 | 0.701235 | 15.65758 |
| 995  | 0.669515 | 0.762791 | 15.65758 |
| 996  | 0.800951 | 0.650713 | 15.65758 |
| 997  | 0.688341 | 0.743621 | 15.65758 |
| 998  | 0.680654 | 0.742041 | 15.65758 |
| 999  | 0.750087 | 0.70924  | 15.65758 |
| 1000 | 0.781958 | 0.684516 | 15.65758 |
| 1001 | 0.837911 | 0.624383 | 15.65758 |
| 1002 | 0.771139 | 0.686127 | 15.65758 |
| 1003 | 0.735688 | 0.722035 | 15.65758 |
| 1004 | 0.747783 | 0.686443 | 15.65758 |
| 1005 | 0.727815 | 0.690349 | 15.65758 |
| 1006 | 0.762345 | 0.700186 | 15.65758 |
| 1007 | 0.718939 | 0.72389  | 15.65758 |
| 1008 | 0.746073 | 0.719766 | 15.65758 |
| 1009 | 0.705781 | 0.738709 | 15.65758 |
| 1010 | 0.793995 | 0.65613  | 15.65758 |
| 1011 | 0.723311 | 0.723929 | 15.65758 |
| 1012 | 0.629387 | 0.786832 | 15.65758 |
| 1013 | 0.77112  | 0.669028 | 15.65758 |
| 1014 | 0.77787  | 0.66907  | 15.65758 |
| 1015 | 0.669405 | 0.76766  | 15.65758 |
| 1016 | 0.705858 | 0.742072 | 15.65758 |



|      |          |          |          |
|------|----------|----------|----------|
| 1017 | 0.680278 | 0.753871 | 15.65758 |
| 1018 | 0.753652 | 0.662044 | 15.65758 |
| 1019 | 0.820061 | 0.647687 | 15.65758 |
| 1020 | 0.72079  | 0.723806 | 15.65758 |
| 1021 | 0.776586 | 0.688046 | 15.65758 |
| 1022 | 0.687348 | 0.754433 | 15.65758 |
| 1023 | 0.690358 | 0.739867 | 15.65758 |
| 1024 | 0.783328 | 0.661857 | 15.65758 |
| 1025 | 0.506323 | 0.861537 | 15.65758 |
| 1026 | 0.67595  | 0.754128 | 15.65758 |
| 1027 | 0.757751 | 0.710844 | 15.65758 |
| 1028 | 0.75452  | 0.709793 | 15.65758 |
| 1029 | 0.757314 | 0.696604 | 15.65758 |
| 1030 | 0.815508 | 0.612907 | 15.65758 |
| 1031 | 0.71877  | 0.729066 | 15.65758 |
| 1032 | 0.743899 | 0.715105 | 15.65758 |
| 1033 | 0.790251 | 0.658635 | 15.65758 |
| 1034 | 0.732677 | 0.729678 | 15.65758 |
| 1035 | 0.35503  | 0.964937 | 15.65758 |
| 1036 | 0.709782 | 0.76099  | 15.65758 |
| 1037 | 0.531547 | 0.847224 | 15.65758 |
| 1038 | 0.732107 | 0.723587 | 15.65758 |
| 1039 | 0.744643 | 0.674368 | 15.65758 |
| 1040 | 0.627713 | 0.793194 | 15.65758 |
| 1041 | 0.756276 | 0.688384 | 15.65758 |
| 1042 | 0.653043 | 0.780371 | 15.65758 |
| 1043 | 0.560027 | 0.833088 | 15.65758 |
| 1044 | 0.711066 | 0.725508 | 15.65758 |
| 1045 | 0.756527 | 0.710687 | 15.65758 |
| 1046 | 0.818695 | 0.634769 | 15.65758 |
| 1047 | 0.695607 | 0.735414 | 15.65758 |
| 1048 | 0.714009 | 0.72878  | 15.65758 |
| 1049 | 0.712248 | 0.741944 | 15.65758 |
| 1050 | 0.775953 | 0.672263 | 15.65758 |
| 1051 | 0.744133 | 0.703175 | 15.65758 |
| 1052 | 0.772121 | 0.684686 | 15.65758 |
| 1053 | 0.713474 | 0.728495 | 15.65758 |
| 1054 | 0.771891 | 0.685924 | 15.65758 |
| 1055 | 0.809628 | 0.654636 | 15.65758 |
| 1056 | 0.760103 | 0.692118 | 15.65758 |
| 1057 | 0.78302  | 0.678274 | 15.65758 |
| 1058 | 0.745836 | 0.714558 | 15.65758 |
| 1059 | 0.768741 | 0.697168 | 15.65758 |
| 1060 | 0.704826 | 0.749205 | 15.65758 |
| 1061 | 0.775161 | 0.683603 | 15.65758 |
| 1062 | 0.732497 | 0.702145 | 15.65758 |
| 1063 | 0.794772 | 0.653777 | 15.65758 |
| 1064 | 0.704785 | 0.741416 | 15.65758 |
| 1065 | 0.610918 | 0.803309 | 15.65758 |
| 1066 | 0.73975  | 0.703612 | 15.65758 |
| 1067 | 0.578734 | 0.819566 | 15.65758 |
| 1068 | 0.755852 | 0.712753 | 15.65758 |
| 1069 | 0.757024 | 0.697733 | 15.65758 |
| 1070 | 0.790732 | 0.687048 | 15.65758 |
| 1071 | 0.63718  | 0.77523  | 15.65758 |
| 1072 | 0.672559 | 0.764661 | 15.65758 |
| 1073 | 0.551601 | 0.837156 | 15.65758 |
| 1074 | 0.838523 | 0.610499 | 15.65758 |
| 1075 | 0.78146  | 0.649677 | 15.65758 |
| 1076 | 0.757695 | 0.682712 | 15.65758 |
| 1077 | 0.765066 | 0.691627 | 15.65758 |
| 1078 | 0.798581 | 0.656941 | 15.65758 |
| 1079 | 0.66402  | 0.761724 | 15.65758 |
| 1080 | 0.720704 | 0.730526 | 15.65758 |
| 1081 | 0.660943 | 0.768078 | 15.65758 |
| 1082 | 0.819114 | 0.637775 | 15.65758 |
| 1083 | 0.74674  | 0.695437 | 15.65758 |
| 1084 | 0.709397 | 0.741257 | 15.65758 |
| 1085 | 0.711678 | 0.738512 | 15.65758 |
| 1086 | 0.688208 | 0.753062 | 15.65758 |
| 1087 | 0.793762 | 0.656493 | 15.65758 |
| 1088 | 0.708538 | 0.730728 | 15.65758 |
| 1089 | 0.801037 | 0.669775 | 15.65758 |
| 1090 | 0.641376 | 0.776633 | 15.65758 |
| 1091 | 0.736028 | 0.720062 | 15.65758 |
| 1092 | 0.674931 | 0.768255 | 15.65758 |
| 1093 | 0.776621 | 0.659614 | 15.65758 |
| 1094 | 0.767389 | 0.680831 | 15.65758 |
| 1095 | 0.790682 | 0.632699 | 15.65758 |
| 1096 | 0.841569 | 0.63514  | 15.65758 |
| 1097 | 0.743903 | 0.704644 | 15.65758 |
| 1098 | 0.805389 | 0.618343 | 15.65758 |
| 1099 | 0.696449 | 0.748044 | 15.65758 |
| 1100 | 0.719927 | 0.715891 | 15.65758 |
| 1101 | 0.69704  | 0.73399  | 15.65758 |
| 1102 | 0.651679 | 0.771676 | 15.65758 |
| 1103 | 0.755278 | 0.670244 | 15.65758 |
| 1104 | 0.720316 | 0.722533 | 15.65758 |
| 1105 | 0.737407 | 0.719694 | 15.65758 |
| 1106 | 0.662154 | 0.766654 | 15.65758 |
| 1107 | 0.830692 | 0.631771 | 15.65758 |
| 1108 | 0.791845 | 0.666042 | 15.65758 |
| 1109 | 0.649861 | 0.777237 | 15.65758 |
| 1110 | 0.686171 | 0.760505 | 15.65758 |
| 1111 | 0.816981 | 0.643317 | 15.65758 |
| 1112 | 0.764978 | 0.679219 | 15.65758 |
| 1113 | 0.614046 | 0.795592 | 15.65758 |
| 1114 | 0.639398 | 0.78214  | 15.65758 |
| 1115 | 0.704238 | 0.733455 | 15.65758 |
| 1116 | 0.755563 | 0.695235 | 15.65758 |
| 1117 | 0.785704 | 0.692678 | 15.65758 |
| 1118 | 0.758935 | 0.708937 | 15.65758 |
| 1119 | 0.781297 | 0.676508 | 15.65758 |

|      |          |          |          |
|------|----------|----------|----------|
| 1120 | 0.71271  | 0.741053 | 15.65758 |
| 1121 | 0.590683 | 0.814181 | 15.65758 |
| 1122 | 0.717742 | 0.722819 | 15.65758 |
| 1123 | 0.692886 | 0.739174 | 15.65758 |
| 1124 | 0.630878 | 0.791091 | 15.65758 |
| 1125 | 0.735303 | 0.720045 | 15.65758 |
| 1126 | 0.631029 | 0.780588 | 15.65758 |
| 1127 | 0.722456 | 0.724475 | 15.65758 |
| 1128 | 0.531931 | 0.848575 | 15.65758 |
| 1129 | 0.70148  | 0.746213 | 15.65758 |
| 1130 | 0.763469 | 0.685513 | 15.65758 |
| 1131 | 0.639119 | 0.773494 | 15.65758 |
| 1132 | 0.772997 | 0.687042 | 15.65758 |
| 1133 | 0.828557 | 0.623948 | 15.65758 |
| 1134 | 0.695512 | 0.755683 | 15.65758 |
| 1135 | 0.742055 | 0.690035 | 15.65758 |
| 1136 | 0.6752   | 0.765561 | 15.65758 |
| 1137 | 0.813241 | 0.638919 | 15.65758 |
| 1138 | 0.800103 | 0.673278 | 15.65758 |
| 1139 | 0.778431 | 0.663085 | 15.65758 |
| 1140 | 0.665075 | 0.758563 | 15.65758 |
| 1141 | 0.239762 | 0.998118 | 15.65758 |
| 1142 | 0.66556  | 0.757436 | 15.65758 |
| 1143 | 0.700001 | 0.735559 | 15.65758 |
| 1144 | 0.678126 | 0.762227 | 15.65758 |
| 1145 | 0.747102 | 0.705114 | 15.65758 |
| 1146 | 0.803634 | 0.660102 | 15.65758 |
| 1147 | 0.783473 | 0.669712 | 15.65758 |
| 1148 | 0.747155 | 0.708985 | 15.65758 |
| 1149 | 0.725198 | 0.702334 | 15.65758 |
| 1150 | 0.685829 | 0.75145  | 15.65758 |
| 1151 | 0.502274 | 0.864317 | 15.65758 |
| 1152 | 0.782728 | 0.672239 | 15.65758 |
| 1153 | 0.72986  | 0.727101 | 15.65758 |
| 1154 | 0.773939 | 0.697421 | 15.65758 |
| 1155 | 0.687333 | 0.743767 | 15.65758 |
| 1156 | 0.707543 | 0.731405 | 15.65758 |
| 1157 | 0.845588 | 0.611515 | 15.65758 |
| 1158 | 0.710151 | 0.732487 | 15.65758 |
| 1159 | 0.641018 | 0.772645 | 15.65758 |
| 1160 | 0.661364 | 0.776176 | 15.65758 |
| 1161 | 0.808727 | 0.653302 | 15.65758 |
| 1162 | 0.766915 | 0.69704  | 15.65758 |
| 1163 | 0.686071 | 0.753808 | 15.65758 |
| 1164 | 0.599673 | 0.805603 | 15.65758 |
| 1165 | 0.794448 | 0.629683 | 15.65758 |
| 1166 | 0.802811 | 0.644151 | 15.65758 |
| 1167 | 0.651216 | 0.772093 | 15.65758 |
| 1168 | 0.795941 | 0.674203 | 15.65758 |
| 1169 | 0.72548  | 0.711849 | 15.65758 |
| 1170 | 0.739106 | 0.712871 | 15.65758 |
| 1171 | 0.730707 | 0.71683  | 15.65758 |
| 1172 | 0.698956 | 0.743106 | 15.65758 |
| 1173 | 0.809202 | 0.661838 | 15.65758 |
| 1174 | 0.821564 | 0.578432 | 15.65758 |
| 1175 | 0.632834 | 0.784984 | 15.65758 |
| 1176 | 0.577107 | 0.821497 | 15.65758 |
| 1177 | 0.707338 | 0.741701 | 15.65758 |
| 1178 | 0.715981 | 0.736117 | 15.65758 |
| 1179 | 0.764327 | 0.675078 | 15.65758 |
| 1180 | 0.807443 | 0.655474 | 15.65758 |
| 1181 | 0.681317 | 0.739627 | 15.65758 |
| 1182 | 0.73531  | 0.704112 | 15.65758 |
| 1183 | 0.66009  | 0.755459 | 15.65758 |
| 1184 | 0.740376 | 0.714956 | 15.65758 |
| 1185 | 0.776033 | 0.672729 | 15.65758 |
| 1186 | 0.740137 | 0.69061  | 15.65758 |
| 1187 | 0.63157  | 0.787747 | 15.65758 |
| 1188 | 0.754081 | 0.697833 | 15.65758 |
| 1189 | 0.74844  | 0.685375 | 15.65758 |
| 1190 | 0.727209 | 0.735502 | 15.65758 |
| 1191 | 0.656472 | 0.77443  | 15.65758 |
| 1192 | 0.796227 | 0.658925 | 15.65758 |
| 1193 | 0.772166 | 0.672837 | 15.65758 |
| 1194 | 0.715671 | 0.736194 | 15.65758 |
| 1195 | 0.52654  | 0.849773 | 15.65758 |
| 1196 | 0.732145 | 0.726056 | 15.65758 |
| 1197 | 0.705633 | 0.734931 | 15.65758 |
| 1198 | 0.768547 | 0.702023 | 15.65758 |
| 1199 | 0.71499  | 0.738296 | 15.65758 |
| 1200 | 0.764234 | 0.694914 | 15.65758 |
| 1201 | 0.673909 | 0.756292 | 15.65758 |
| 1202 | 0.682181 | 0.744902 | 15.65758 |
| 1203 | 0.774757 | 0.684742 | 15.65758 |
| 1204 | 0.680445 | 0.757292 | 15.65758 |
| 1205 | 0.69218  | 0.741157 | 15.65758 |
| 1206 | 0.76709  | 0.67628  | 15.65758 |
| 1207 | 0.736914 | 0.707589 | 15.65758 |
| 1208 | 0.708526 | 0.729553 | 15.65758 |
| 1209 | 0.708515 | 0.728573 | 15.65758 |
| 1210 | 0.740751 | 0.717606 | 15.65758 |
| 1211 | 0.623889 | 0.794416 | 15.65758 |
| 1212 | 0.807316 | 0.656808 | 15.65758 |
| 1213 | 0.762856 | 0.706352 | 15.65758 |
| 1214 | 0.712044 | 0.736508 | 15.65758 |
| 1215 | 0.588046 | 0.817042 | 15.65758 |
| 1216 | 0.755743 | 0.686084 | 15.65758 |
| 1217 | 0.757567 | 0.666973 | 15.65758 |
| 1218 | 0.278226 | 0.974871 | 15.65758 |
| 1219 | 0.725258 | 0.723067 | 15.65758 |
| 1220 | 0.70005  | 0.736196 | 15.65758 |
| 1221 | 0.58577  | 0.814576 | 15.65758 |
| 1222 | 0.723187 | 0.720456 | 15.65758 |

|      |          |          |          |
|------|----------|----------|----------|
| 1223 | 0.714422 | 0.730269 | 15.65758 |
| 1224 | 0.577502 | 0.822202 | 15.65758 |
| 1225 | 0.693312 | 0.751261 | 15.65758 |
| 1226 | 0.791282 | 0.685651 | 15.65758 |
| 1227 | 0.564387 | 0.829423 | 15.65758 |
| 1228 | 0.747661 | 0.704331 | 15.65758 |
| 1229 | 0.720655 | 0.713909 | 15.65758 |
| 1230 | 0.662961 | 0.769072 | 15.65758 |
| 1231 | 0.72137  | 0.721816 | 15.65758 |
| 1232 | 0.686161 | 0.748134 | 15.65758 |
| 1233 | 0.809834 | 0.661821 | 15.65758 |
| 1234 | 0.76412  | 0.698151 | 15.65758 |
| 1235 | 0.689511 | 0.733263 | 15.65758 |
| 1236 | 0.792592 | 0.657457 | 15.65758 |
| 1237 | 0.766558 | 0.712442 | 15.65758 |
| 1238 | 0.761543 | 0.706918 | 15.65758 |
| 1239 | 0.550016 | 0.837194 | 15.65758 |
| 1240 | 0.730906 | 0.726227 | 15.65758 |
| 1241 | 0.793114 | 0.681477 | 15.65758 |
| 1242 | 0.784768 | 0.672592 | 15.65758 |
| 1243 | 0.747936 | 0.716881 | 15.65758 |
| 1244 | 0.725548 | 0.721379 | 15.65758 |
| 1245 | 0.629535 | 0.794369 | 15.65758 |
| 1246 | 0.839963 | 0.619946 | 15.65758 |
| 1247 | 0.630581 | 0.786691 | 15.65758 |
| 1248 | 0.802012 | 0.65231  | 15.65758 |
| 1249 | 0.704737 | 0.732707 | 15.65758 |
| 1250 | 0.684682 | 0.75004  | 15.65758 |
| 1251 | 0.751803 | 0.681922 | 15.65758 |
| 1252 | 0.727949 | 0.725403 | 15.65758 |
| 1253 | 0.695998 | 0.751598 | 15.65758 |
| 1254 | 0.484333 | 0.874303 | 15.65758 |
| 1255 | 0.698134 | 0.743205 | 15.65758 |
| 1256 | 0.714551 | 0.727829 | 15.65758 |
| 1257 | 0.66066  | 0.782367 | 15.65758 |
| 1258 | 0.785997 | 0.641922 | 15.65758 |
| 1259 | 0.784753 | 0.691787 | 15.65758 |
| 1260 | 0.779707 | 0.685682 | 15.65758 |
| 1261 | 0.825568 | 0.627843 | 15.65758 |
| 1262 | 0.72802  | 0.711189 | 15.65758 |
| 1263 | 0.75862  | 0.696339 | 15.65758 |
| 1264 | 0.747344 | 0.700294 | 15.65758 |
| 1265 | 0.694342 | 0.746211 | 15.65758 |
| 1266 | 0.860389 | 0.599314 | 15.65758 |
| 1267 | 0.759755 | 0.703841 | 15.65758 |
| 1268 | 0.642002 | 0.777851 | 15.65758 |
| 1269 | 0.776608 | 0.633207 | 15.65758 |
| 1270 | 0.744324 | 0.704364 | 15.65758 |
| 1271 | 0.741291 | 0.712387 | 15.65758 |
| 1272 | 0.744685 | 0.694415 | 15.65758 |
| 1273 | 0.702378 | 0.745417 | 15.65758 |
| 1274 | 0.779596 | 0.6634   | 15.65758 |
| 1275 | 0.756676 | 0.701942 | 15.65758 |
| 1276 | 0.677364 | 0.771027 | 15.65758 |
| 1277 | 0.714177 | 0.733026 | 15.65758 |
| 1278 | 0.722679 | 0.730909 | 15.65758 |
| 1279 | 0.702159 | 0.743194 | 15.65758 |
| 1280 | 0.74375  | 0.702985 | 15.65758 |
| 1281 | 0.812572 | 0.642327 | 15.65758 |
| 1282 | 0.720098 | 0.735015 | 15.65758 |
| 1283 | 0.749565 | 0.69603  | 15.65758 |
| 1284 | 0.75384  | 0.709555 | 15.65758 |
| 1285 | 0.779544 | 0.686506 | 15.65758 |
| 1286 | 0.585673 | 0.817444 | 15.65758 |
| 1287 | 0.62267  | 0.793432 | 15.65758 |

|      |          |          |          |
|------|----------|----------|----------|
| 1288 | 0.75075  | 0.679543 | 15.65758 |
| 1289 | 0.769074 | 0.714154 | 15.65758 |
| 1290 | 0.672913 | 0.755533 | 15.65758 |
| 1291 | 0.791189 | 0.677605 | 15.65758 |
| 1292 | 0.687371 | 0.748525 | 15.65758 |
| 1293 | 0.728507 | 0.727564 | 15.65758 |
| 1294 | 0.712912 | 0.744501 | 15.65758 |
| 1295 | 0.770852 | 0.664634 | 15.65758 |
| 1296 | 0.722733 | 0.720011 | 15.65758 |
| 1297 | 0.779218 | 0.666609 | 15.65758 |
| 1298 | 0.647898 | 0.727269 | 15.65758 |
| 1299 | 0.796565 | 0.6778   | 15.65758 |
| 1300 | 0.777649 | 0.685544 | 15.65758 |
| 1301 | 0.697163 | 0.750899 | 15.65758 |
| 1302 | 0.723201 | 0.736601 | 15.65758 |
| 1303 | 0.663783 | 0.771957 | 15.65758 |
| 1304 | 0.79649  | 0.632939 | 15.65758 |
| 1305 | 0.716883 | 0.734674 | 15.65758 |
| 1306 | 0.826048 | 0.635109 | 15.65758 |
| 1307 | 0.81099  | 0.665067 | 15.65758 |
| 1308 | 0.721699 | 0.720644 | 15.65758 |
| 1309 | 0.779276 | 0.691522 | 15.65758 |
| 1310 | 0.707097 | 0.750393 | 15.65758 |
| 1311 | 0.768244 | 0.65827  | 15.65758 |
| 1312 | 0.693818 | 0.742331 | 15.65758 |
| 1313 | 0.654357 | 0.774034 | 15.65758 |
| 1314 | 0.731014 | 0.727412 | 15.65758 |
| 1315 | 0.820342 | 0.606148 | 15.65758 |
| 1316 | 0.719218 | 0.72763  | 15.65758 |
| 1317 | 0.792234 | 0.649942 | 15.65758 |
| 1318 | 0.607372 | 0.801541 | 15.65758 |
| 1319 | 0.767538 | 0.694009 | 15.65758 |
| 1320 | 0.672924 | 0.771797 | 15.65758 |
| 1321 | 0.700652 | 0.744471 | 15.65758 |
| 1322 | 0.704809 | 0.723656 | 15.65758 |
| 1323 | 0.814738 | 0.629158 | 15.65758 |
| 1324 | 0.790582 | 0.628781 | 15.65758 |
| 1325 | 0.718023 | 0.713256 | 15.65758 |
| 1326 | 0.783174 | 0.692256 | 15.65758 |
| 1327 | 0.675715 | 0.755211 | 15.65758 |
| 1328 | 0.659093 | 0.769057 | 15.65758 |
| 1329 | 0.668308 | 0.758882 | 15.65758 |
| 1330 | 0.669046 | 0.752132 | 15.65758 |
| 1331 | 0.744776 | 0.714642 | 15.65758 |
| 1332 | 0.670585 | 0.764935 | 15.65758 |
| 1333 | 0.68995  | 0.740489 | 15.65758 |
| 1334 | 0.607847 | 0.796431 | 15.65758 |
| 1335 | 0.754045 | 0.70841  | 15.65758 |
| 1336 | 0.611958 | 0.805104 | 15.65758 |
| 1337 | 0.746985 | 0.705477 | 15.65758 |
| 1338 | 0.753129 | 0.69097  | 15.65758 |
| 1339 | 0.825727 | 0.661501 | 15.65758 |
| 1340 | 0.697593 | 0.745985 | 15.65758 |
| 1341 | 0.621878 | 0.792016 | 15.65758 |
| 1342 | 0.760842 | 0.704345 | 15.65758 |
| 1343 | 0.771142 | 0.677164 | 15.65758 |
| 1344 | 0.775522 | 0.678941 | 15.65758 |
| 1345 | 0.488443 | 0.872785 | 15.65758 |
| 1346 | 0.687731 | 0.754729 | 15.65758 |
| 1347 | 0.72357  | 0.736731 | 15.65758 |
| 1348 | 0.756148 | 0.677644 | 15.65758 |
| 1349 | 0.727772 | 0.709451 | 15.65758 |

**Table S2. Phenotypic characteristics of GTEx lung tissue donors**

| Feature                       | Number of individuals (%) | Median (range)     |
|-------------------------------|---------------------------|--------------------|
| Sex                           |                           |                    |
| Female                        | 183 (31.7)                |                    |
| Male                          | 395 (68.3)                |                    |
| Age                           |                           | 56 (21 - 70)       |
| <40                           | 73 (12.6)                 |                    |
| 40-49                         | 93 (16.1)                 |                    |
| 50-59                         | 200 (34.6)                |                    |
| 60-69                         | 190 (32.9)                |                    |
| >69                           | 22 (3.8)                  |                    |
| Body mass index               |                           | 27.7 (17.0 - 35.4) |
| <25                           | 155 (26.8)                |                    |
| 25-30                         | 246 (42.6)                |                    |
| >30                           | 177 (30.6)                |                    |
| Race                          |                           |                    |
| Caucasian                     | 493 (85.9)                |                    |
| Black/African American        | 70 (12.2)                 |                    |
| Asian                         | 10 (1.7)                  |                    |
| American Indian/Alaska Native | 1 (0.2)                   |                    |
| Smoking status                |                           |                    |
| Non-smoker                    | 180 (32.0)                |                    |
| Smoker                        | 382 (68.0)                |                    |

**Table S3. Multivariate analysis of ACE2 expression in human lung tissue**

| Variable                             | $\beta$ value | S.E.  | <i>t</i> value | <i>p</i> value  |      |
|--------------------------------------|---------------|-------|----------------|-----------------|------|
| CD8+ T cells                         | -2.719        | 0.584 | -4.656         | <b>4.02e-06</b> | **** |
| NK cells resting                     | -3.128        | 0.583 | -5.366         | <b>1.18e-07</b> | **** |
| NK cells activated                   | -2.281        | 0.704 | -3.241         | <b>0.0013</b>   | **   |
| M1 macrophages                       | -4.963        | 1.339 | -3.707         | <b>0.0002</b>   | ***  |
| CD4+ T cells                         | 0.453         | 0.513 | 0.882          | 0.3781          |      |
| Dendritic cells                      | -12.793       | 6.688 | -1.913         | 0.0563          |      |
| Neutrophils                          | -0.398        | 0.469 | -0.848         | 0.3971          |      |
| Sex = male (vs. female)              | 0.065         | 0.056 | 1.16           | 0.2466          |      |
| Age                                  | 0.004         | 0.002 | 1.799          | 0.0726          |      |
| BMI                                  | -0.004        | 0.006 | -0.556         | 0.5787          |      |
| Race = Caucasian (vs. non-Caucasian) | -0.096        | 0.073 | -1.313         | 0.1899          |      |
| Smoking status = yes (vs. no)        | -0.025        | 0.058 | -0.433         | 0.6650          |      |

Abbreviations: S.E., Standard Error.

**Table S4. Meta-analysis of ACE2 mRNA and protein levels in 17 human tissues**

Source data of Fig. 2f.

| Source data type                                                                                                                                             | Source data method | Adipose tissue | Airway epithelium | Brain | Cardiac muscle | Colorectal tissue | Endometrium | Gall bladder | Kidney | Liver | Lung | Oral mucosa/esophagus | Skin | Small intestine | Smooth muscle | Spleen | Stomach | Testis | Ref. |
|--------------------------------------------------------------------------------------------------------------------------------------------------------------|--------------------|----------------|-------------------|-------|----------------|-------------------|-------------|--------------|--------|-------|------|-----------------------|------|-----------------|---------------|--------|---------|--------|------|
| mRNA                                                                                                                                                         | NB                 | 0              | N                 | N     | 3              | 2                 | 0           | N            | 3      | 0     | 0    | N                     | 0    | 2               | 0             | N      | N       | 3      | [1]  |
| mRNA                                                                                                                                                         | qRT-PCR            | 1              | 1                 | 0     | 2              | 2                 | 1           | 2            | 2      | 1     | 1    | 1                     | 0    | 3               | 1             | 0      | 1       | 3      | [2]  |
| mRNA                                                                                                                                                         | MA                 | 2              | 2                 | 2     | 2              | 2                 | 1           | N            | 3      | 2     | 2    | N                     | 1    | 3               | 2             | N      | N       | 3      | [3]  |
| mRNA                                                                                                                                                         | RNAseq             | 2              | N                 | 2     | 2              | 1                 | 1           | 3            | 3      | 0     | 0    | 0                     | 1    | 3               | 2             | N      | 0       | 3      | [4]  |
| mRNA                                                                                                                                                         | RNAseq             | N              | N                 | N     | N              | N                 | N           | N            | N      | N     | N    | 1                     | N    | N               | N             | N      | N       | N      | [5]  |
| mRNA                                                                                                                                                         | CAGE               | 0              | N                 | 0     | 1              | 2                 | 0           | 1            | 1      | 0     | 0    | 0                     | N    | 3               | 0             | 0      | N       | 2      | [6]  |
| Protein                                                                                                                                                      | MS                 | N              | N                 | 0     | 1              | 0                 | N           | 1            | 3      | 1     | 0    | 0                     | N    | N               | N             | N      | N       | 3      | [7]  |
| Protein                                                                                                                                                      | IHC                | 3              | 1                 | 1     | N              | 1                 | N           | N            | 3      | 1     | 3    | 2                     | 3    | 3               | 3             | 3      | 0       | N      | [8]  |
| Protein                                                                                                                                                      | IHC                | 0              | 0                 | 0     | 1              | 2                 | 0           | 3            | 3      | 0     | 0    | 0                     | 0    | 3               | 0             | 0      | 0       | 3      | [9]  |
| <b>Scores (averages)</b>                                                                                                                                     |                    |                |                   |       |                |                   |             |              |        |       |      |                       |      |                 |               |        |         |        |      |
| <b>mRNA score</b>                                                                                                                                            |                    | 1.0            | 1.5               | 1.0   | 2.0            | 1.8               | 0.6         | 2.0          | 2.4    | 0.6   | 0.6  | 0.5                   | 0.5  | 2.8             | 1.0           | 0.0    | 0.5     | 2.8    |      |
| <b>Protein score</b>                                                                                                                                         |                    | 1.5            | 0.5               | 0.3   | 1.0            | 1.0               | 0.0         | 2.0          | 3.0    | 0.7   | 1.0  | 0.7                   | 1.5  | 3.0             | 1.5           | 1.5    | 0.0     | 3.0    |      |
| Abbreviations: CAGE, cap analysis of gene expression; IHC, immunohistochemistry; MA, microarray; MS, mass spectrometry; N, not determined; NB Northern blot. |                    |                |                   |       |                |                   |             |              |        |       |      |                       |      |                 |               |        |         |        |      |

### Supplementary References

1. Tipnis, S.R., et al., *A human homolog of angiotensin-converting enzyme. Cloning and functional expression as a captopril-insensitive carboxypeptidase.* J Biol Chem, 2000. **275**(43): p. 33238-43.
2. Harmer, D., et al., *Quantitative mRNA expression profiling of ACE 2, a novel homologue of angiotensin converting enzyme.* FEBS Lett, 2002. **532**(1-2): p. 107-10.
3. Wu, C., et al., *BioGPS: building your own mash-up of gene annotations and expression profiles.* Nucleic Acids Res, 2016. **44**(D1): p. D313-6.
4. Uhlen, M., et al., *A pathology atlas of the human cancer transcriptome.* Science, 2017. **357**(6352).
5. GTEx Consortium, *Genetic effects on gene expression across human tissues.* Nature, 2017. **550**(7675): p. 204-213.
6. FANTOM Consortium, RIKEN PMI, CLST (DGT), *A promoter-level mammalian expression atlas.* Nature, 2014. **507**(7493): p. 462-70.
7. Kim, M.S., et al., *A draft map of the human proteome.* Nature, 2014. **509**(7502): p. 575-81.
8. Hamming, I., et al., *Tissue distribution of ACE2 protein, the functional receptor for SARS coronavirus. A first step in understanding SARS pathogenesis.* J Pathol, 2004. **203**(2): p. 631-7.
9. Thul, P.J., et al., *A subcellular map of the human proteome.* Science, 2017. **356**(6340).
